# Supplementary material for: Epigenetic resetting in the human germ line entails histone modification remodeling
Source: PubMed Central journal article supplement (PMC9848478; doi:10.1126/sciadv.ade1257), 2023-01-18
Supplement: sciadv.ade1257_sm.pdf [file sciadv.ade1257_sm.pdf]

Supplementary Materials for  
**Epigenetic resetting in the human germ line entails histone  
modification remodeling**

Wolfram H. Gruhn *et al.*

Corresponding author: Wolfram H. Gruhn, [w.gruhn@gurdon.cam.ac.uk](mailto:w.gruhn@gurdon.cam.ac.uk);  
M. Azim Surani, [a.surani@gurdon.cam.ac.uk](mailto:a.surani@gurdon.cam.ac.uk)

*Sci. Adv.* **9**, eade1257 (2023)  
DOI: 10.1126/sciadv.ade1257

**This PDF file includes:**

Figs. S1 to S11  
Tables S1 and S2

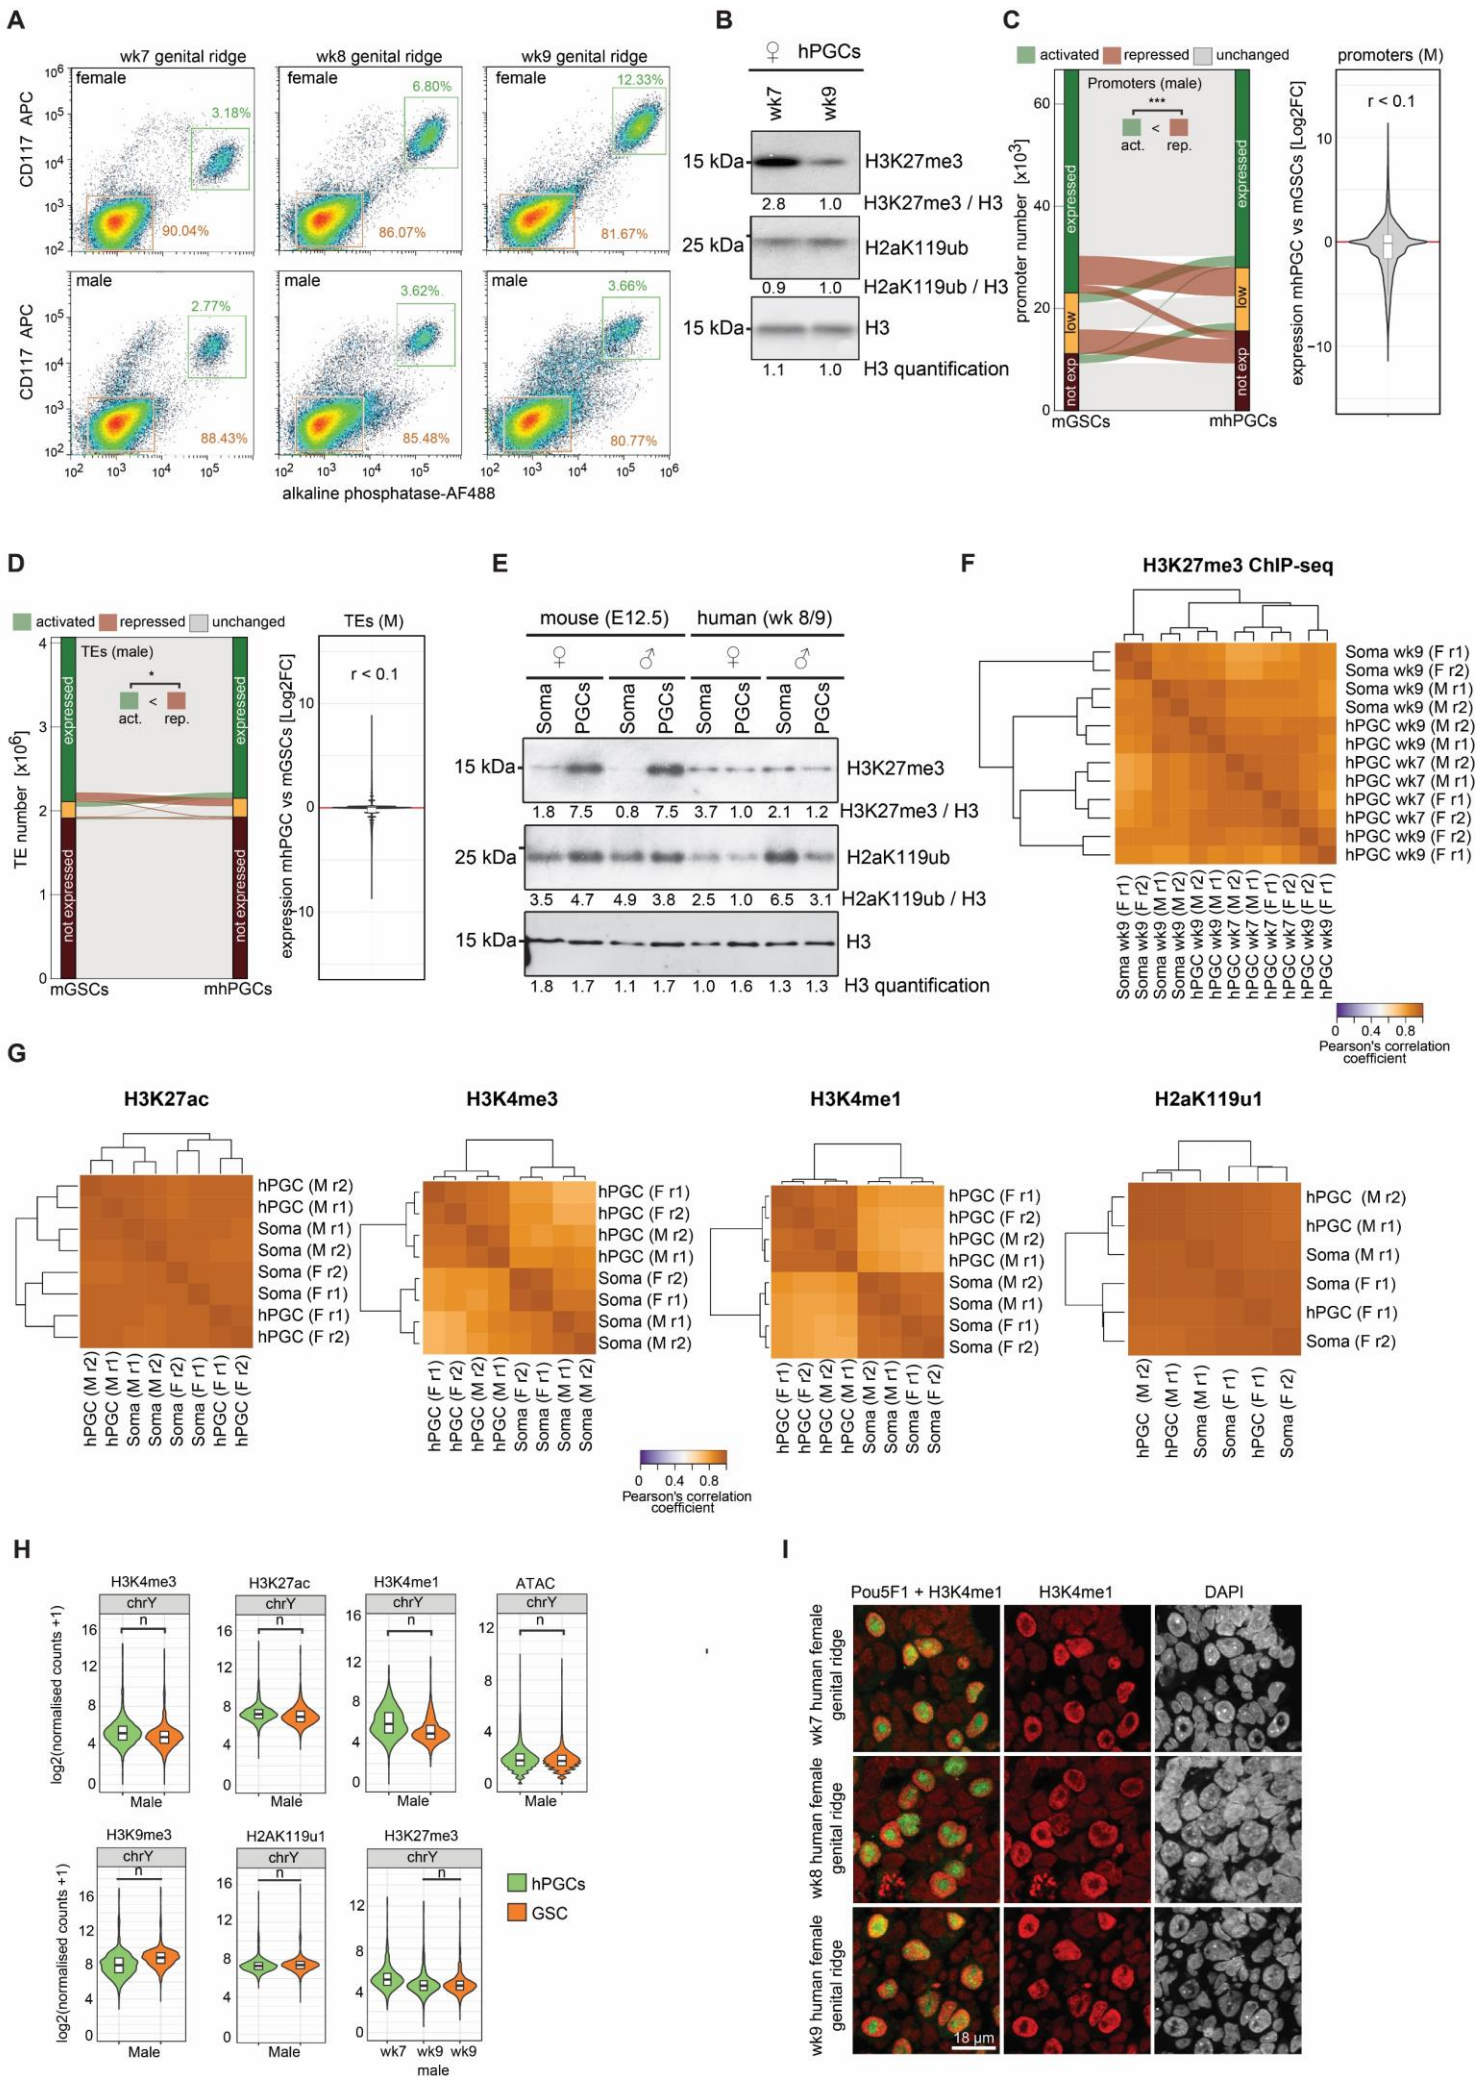

**Figure S1: Epigenetic and transcriptomic state of gonadal hPGCs and adjacent gonadal somatic cells.**

**A.** FACS analysis depicting the proportion of tissue-nonspecific alkaline phosphatase (AP) positive (+) and CD117 positive hPGCs in male and female genital ridges at week 7, 8 and 9 of embryonic development.

**B.** Western Blot comparing H3K27me3 and H2aK119ub levels in week 7 and week 9 FACS-purified fhPGCs. Quantification of H3 and quantification relative to H3 for H3K27me3 and H2aK119ub are shown.

**C-D.** Comparison of gene (**C**) and TE (**D**) expression between mhPGCs and mGSCs. Genes / TEs were grouped according to their expression level into i.) expressed (dark green), ii.) lowly expressed (orange), and iii.) not expressed genes (dark red) (see Methods). No broad expression change (grey), reduced expression (red) or elevated expression (green) in hPGCs are indicated (left panel). Wilcoxon effect size is shown. Violine plot depicting expression changes of 66,495 human transcripts (**C**) and 3,040,811 annotated TEs (**D**) in mhPGCs relative to gonadal somatic cells (right panel).  $r$  = Wilcoxon effect size

**E.** Western Blot of PGCs and gonadal somatic cells, FACS-purified from male and female E12.5 GOF mouse embryos, week 8 female and 9 male human genital ridges. Levels of H3K27me3, H2aK119ub and H3 were analysed. Quantification of H3 and quantification relative to H3 for H3K27me3 and H2aK119ub are shown.

**F/G.** Pearson correlation of peak distribution of individual ChIP-seq experiments targeting the indicated histone modifications

**H.** Spike-in normalized read counts falling into 5-kb bins covering the Y chromosomes for the indicated ChIP-seq experiments on male hPGCs and gonadal somatic cells. ATAC-seq reads were analysed in 1-kb bins. Wilcoxon effect size is shown.

**I.** Immunofluorescence staining of POU5F1 (green) and H3K4me1 (red) on wk7-9 female human genital ridges. DAPI staining is shown to indicate the location of the nuclei.

**A**

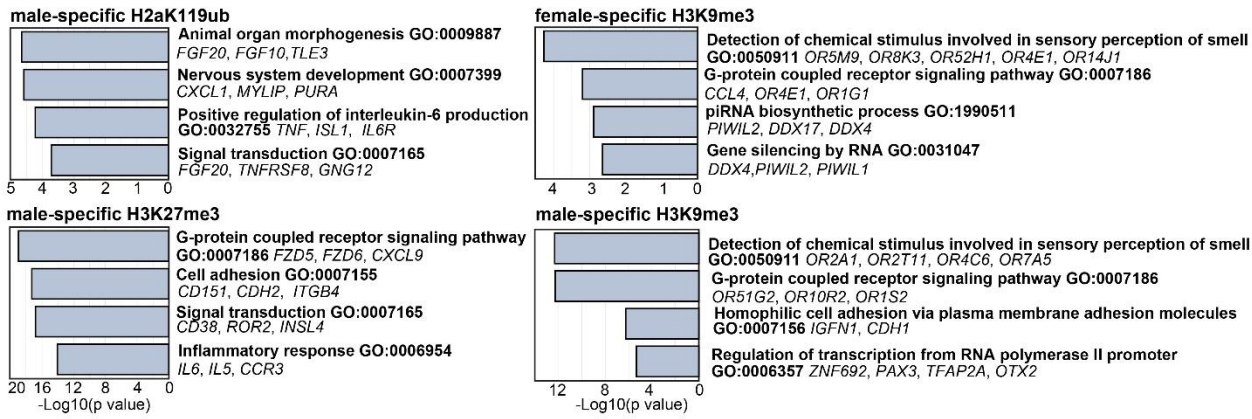

**B**

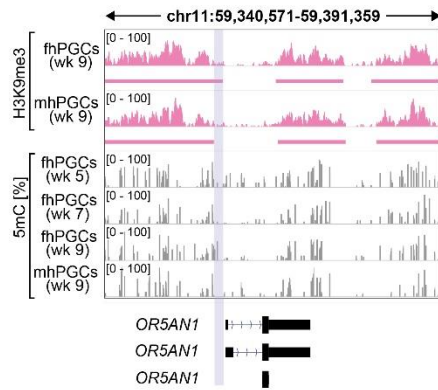

**C**

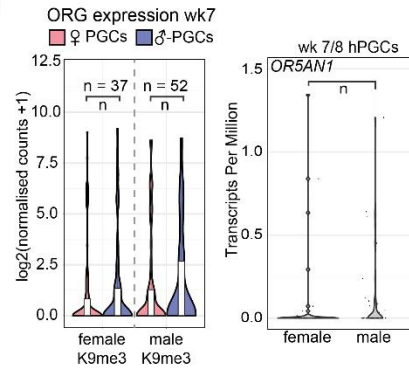

**D**

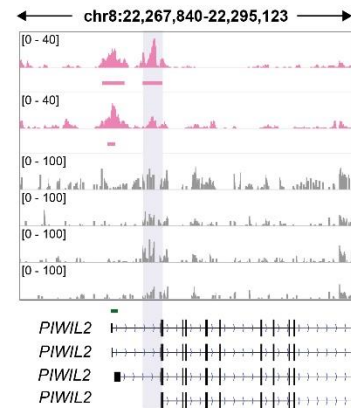

**E**

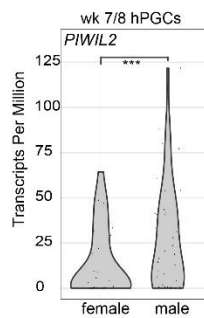

**F**

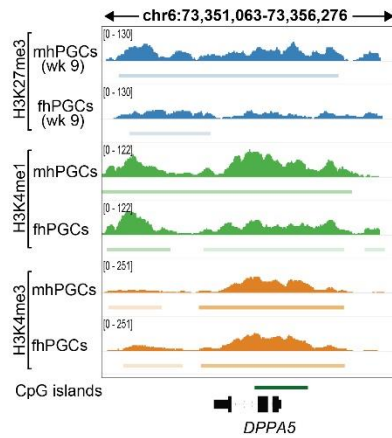

**G**

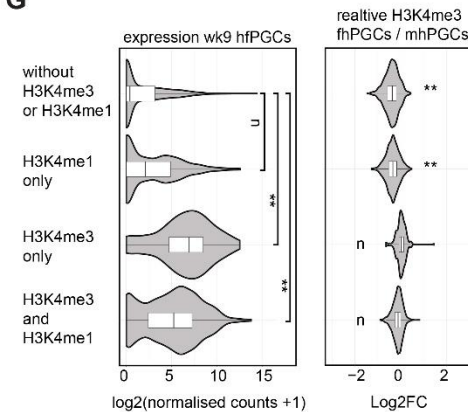

**H**

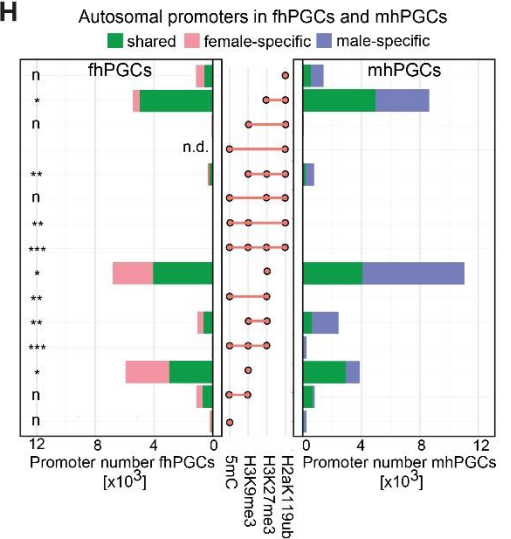

**Figure S2: Epigenetic promoter regulation in male and female hPGCs.**

**A.** Gene ontology enrichment analysis of genes associated with promoters showing female-specific occupancy of H3K9me3, or male-specific occupancy of H3K27me3, H3K9me3 or H2aK119ub in hPGCs.

**B.** Genome browser view of the *OR5AN1* locus showing the indicated epigenetic modifications in fhPGCs and mhPGCs.

**C.** Expression of ORGs, sex-specifically occupied by H3K9me3, in female (red) and male (blue) hPGCs, respectively. Wilcoxon effect size is shown (left panel). *OR5AN1* expression in mhPGCs and fhPGCs (right panel). Re-analysis of single cell RNA-seq data (30). Sleuth's likelihood ratio test is shown. n,  $P > 0.05$

**D.** Genome browser view of the *PIWIL2* locus. Shown epigenetic modifications in fhPGCs and mhPGCs as indicated in Fig. S2B.

**E.** *PIWIL2* expression in mhPGCs and fhPGCs. Reanalysis of single cell RNA-seq data<sup>30</sup>. Sleuth's likelihood ratio test is shown. \*\*\*.  $P < 0.005$

**F.** Genome browser view of the *DPPA5* locus showing the indicated epigenetic modifications in fhPGCs and mhPGCs.

**G.** Expression of genes associated with male-specific H3K27me3 promoters, co-occupied by the indicated epigenetic marks in wk9 fhPGCs. Wilcoxon effect size is shown (left panel). Differential H3K4me3 level between fhPGCs and mhPGCs at male-specific H3K27me3 promoters, co-occupied by the indicated epigenetic marks. Wilcoxon effect size of differential H3K4me3 levels in fhPGCs and mhPGCs (right panel).

**H.** Number of promoters occupied by the indicated combinations of repressive marks in mhPGCs and fhPGCs. Colour code indicates promoters occupied by the same combination of repressive marks in germ cells of both sexes (green) or specifically male (blue) or female hPGCs (red). Chi-square “goodness-of-fit” derived effect size.

Effect size levels as in Figure 1.





**Figure S3: Epigenetic promoter regulation in female hPGCs.**

**A.** SOM analysis depicting clustering of transcript levels, H3K27me3, H2aK119ub, H3K9me3, 5mC, H3K4me3, H3K27ac, H3K4me1 promoter occupancy and ATAC-seq signal, in fhPGCs and changes of these features relative to fGSCs. GpC promoter content and promoter number in each SOM node (right, lower panel). For differential levels between fhPGCs and fGSCs paired Wilcoxon effect size ( $r$ ) was determined and only nodes with  $r > 0.2$  are shown.

**B.** Summary of the SOM analysis of repressive epigenetic mark in fhPGCs (left). Gene ontology enrichment analysis of promoters occupied in fhPGCs by H3K9me3 (blue), H3K9me3 and 5mC (orange), H3K27me3 (violet) or H3K27me3 and H2aK119ub (yellow) (right).

**C.** Comparison of promoters occupied by H3K27me3 and H3K27me3/H2aK119ub in fGSCs with the repressive epigenetic state of these promoters in fhPGCs. Chi-square “goodness-of-fit” test \*\*\*\*:  $P < 0.001$

**D.** Epigenetic state of promoters associated with DNA methylation sensitive genes identified before (2) in fhPGCs (left panel) and mhPGCs (right panel). Colour code indicates the co-occupancy with the active marks H3K4me3 (opal), H3K27ac (green), both marks (orange) or none of them (grey). Chi-square “goodness-of-fit” derived effect size ( $r$ ) no practical difference (n):  $r < 0.2$ , \*:  $0.2 \leq r < 0.3$ , \*\*:  $0.3 \leq r < 0.5$ , \*\*\*:  $r \geq 0.5$

**A-D.** H3K27me3 occupancy was determined in wk9 fhPGCs/fGSCs.



**A**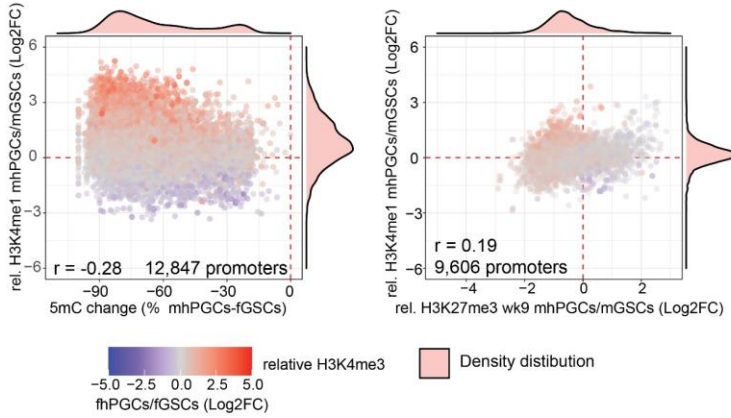**B**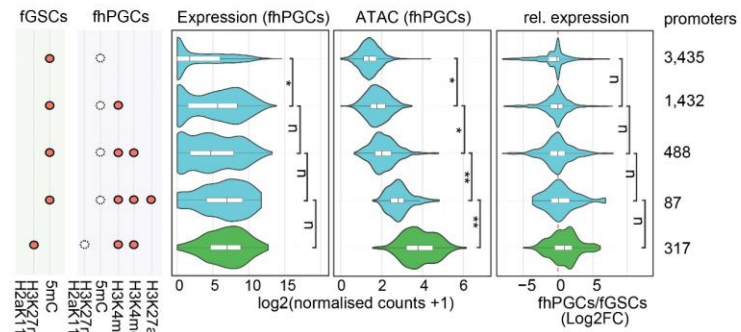**C**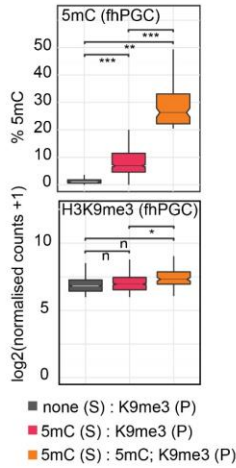**D**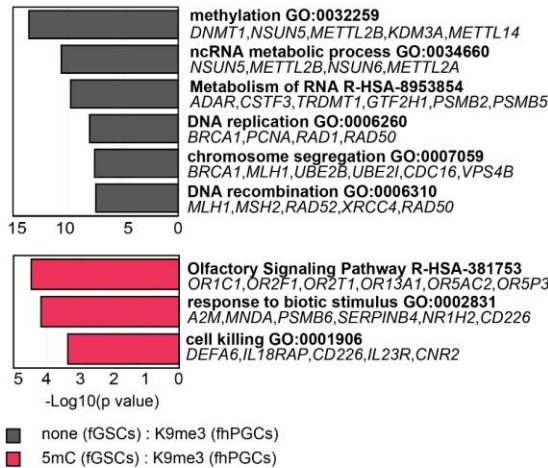**E**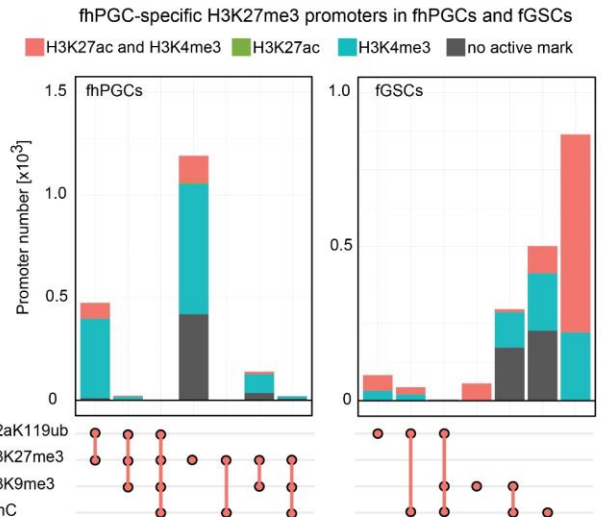**F**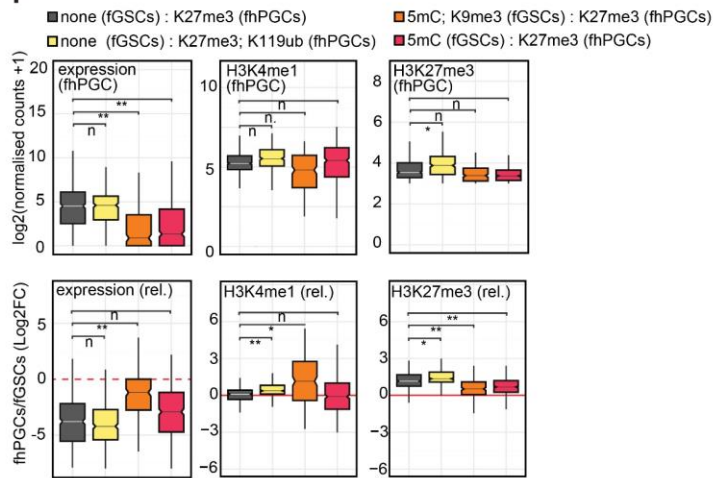**G**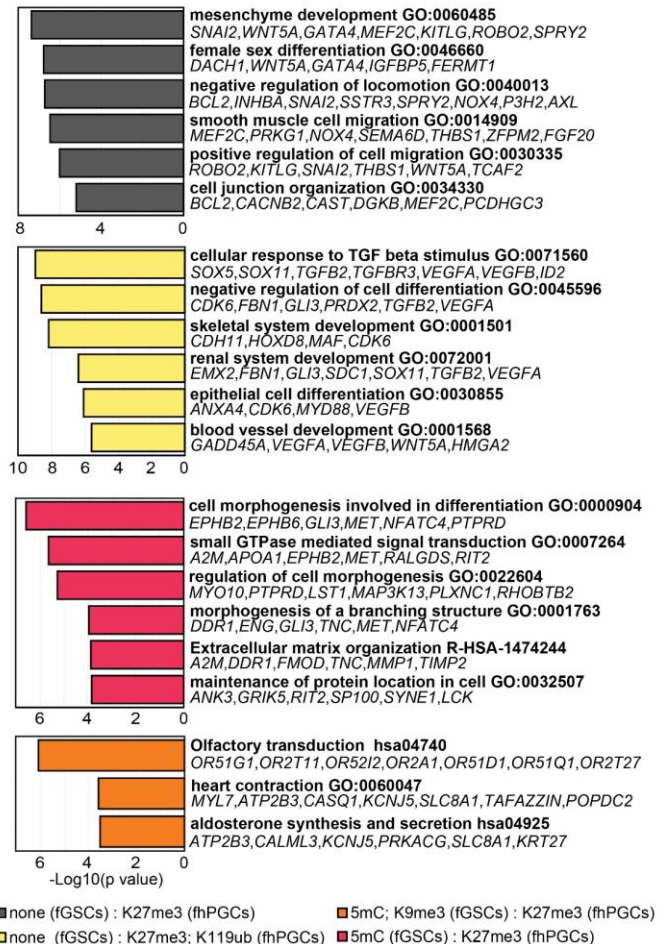



**Figure S4: Putative epigenetic compensation for the loss of DNA methylation in fhPGCs.**

**A.** Scattered plot depicting the correlation between changes of promoter DNA methylation and promoter H3K4me1 levels (left) or changes promoter H3K27me3 and H3K4me1 levels (right). Differential 5mC levels were determined between mhPGCs and fGSCs, differential H3K27me3 and H3K4me1 levels were determined between mhPGCs and mGSCs. Colour code indicates changes in H3K4me3 promoter levels between mhPGCs and mGSCs (Log2 FC mhPGCs/mGSCs). Pearson correlation coefficient (r) is shown. Promoters co-occupied by H3K27me3 and 5mC in mhPGCs or GSCs were excluded from the analysis. Density distribution is shown on each axis.

**B.** Expression and chromatin accessibility of promoters specifically occupied by 5mC (opal) or H3K27me3/H2aK119ub (green) in fGSCs and marked by the indicated epigenetic modification specifically in fhPGCs. The analysed promoters harboured no detectable repressive marks in fhPGCs and were only occupied by the indicated repressive marks in fGSCs. Wilcoxon effect size is shown.

**C.** DNA methylation and H3K9me3 levels of fhPGC-specific H3K9me3 promoters occupied in fGSCs (S) by no repressive mark (grey) or 5mC (red). Promoters specifically co-occupied by H3K9me3 and 5mC in fhPGCs (P) are depicted in orange. Wilcoxon effect size is shown.

**D.** Gene ontology enrichment analysis of promoters with fhPGC-specific H3K9me3 occupancy and no repressive marks (grey) or 5mC occupancy (red) in somatic cells.

**E.** Epigenetic state of fhPGC-specific H3K27me3 promoters in fhPGCs. Depicted are combinations of repressive epigenetic marks found at these promoters in fhPGCs (left) and fGSCs (right). Colour code indicates the co-occupancy with the active marks H3K4me3 (opal), H3K27ac (green), both marks (orange) or none of them (grey).

**F-G.** Expression and epigenetic state (**F**) and gene ontology enrichment analysis (**G**) of promoters, not occupied by a repressive mark in somatic cells and marked by H3K27me3 (grey) or H3K27me3 and H2aK119ub (yellow) in fhPGCs. In addition, promoters are shown occupied by 5mC (red) or 5mC and H3K9me3 (orange) in somatic cells and only marked by H3K27me3 in fhPGCs.

**A-G.** H3K27me3 occupancy was determined in wk9 fhPGCs / fGSCs.

Effect size levels as in Figure 1.

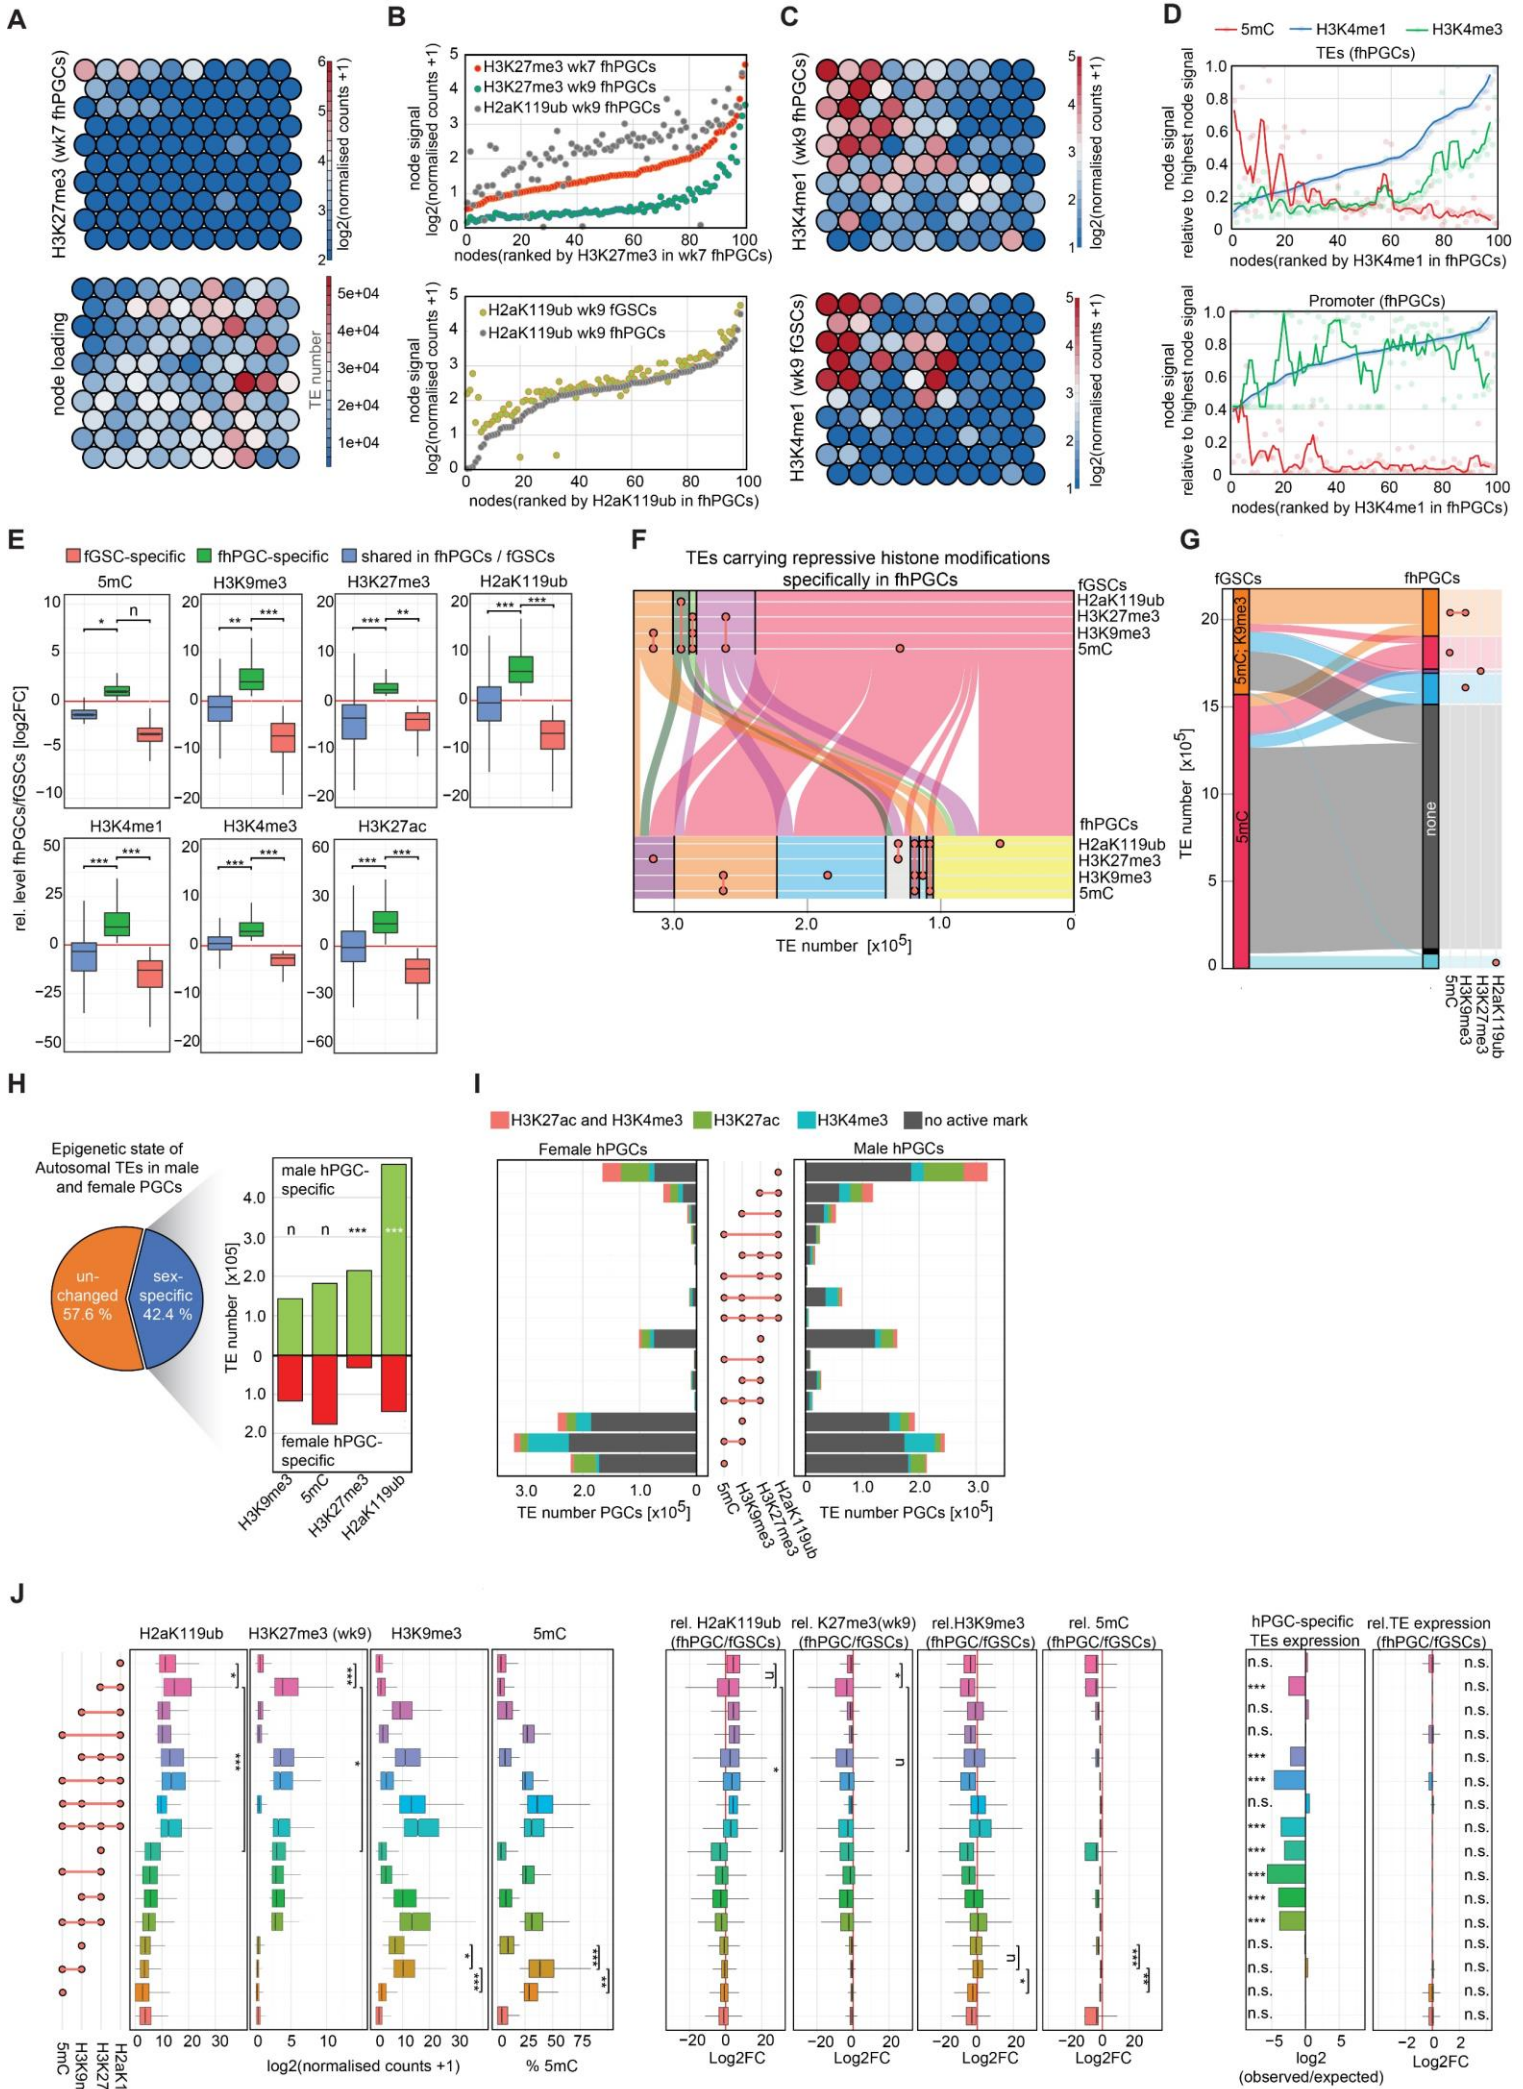

**Figure S5: Characterisation of the epigenetic environment at TEs in hPGCs.**

**A.** SOM analysis of TEs depicting H3K27me3 occupancy in wk7 fhPGCs (upper panel) and TE loading in all SOM nodes shown in Fig. 5A, Fig. S5A, C (lower panel).

**B.** TE SOM node average values for H3K27me3 in wk7 and wk9 fhPGCs and H2aK119ub in wk9 fhPGCs. Nodes were ranked by the H3K27me3 occupancy in wk7 fhPGCs (upper panel). TE SOM node average values for H2aK119ub in fhPGCs and fGSCs. Nodes were ranked by the H2aK119ub occupancy in fhPGCs (lower panel).

**C.** TE SOM analysis depicting H3K4me1 occupancy in fhPGCs and fGSCs.

**D.** SOM analysis on TEs (upper panel) and promoters (lower panel) in fhPGCs. SOM node average values for H3K4me1 and H3K4me3 and 5mC are depicted. Nodes were ranked by the H3K4me1 occupancy in fhPGCs.

**E.** Relative occupancy levels of the indicated modifications in fhPGCs/fGSCs at TEs occupied by the corresponding modification specifically in fhPGCs (green), or fGSCs (red) or in both cell types (blue). Wilcoxon effect size ( $r$ ). no practical difference (n):  $r < 0.2$ , \*:  $0.2 \leq r < 0.3$ , \*\*:  $0.3 \leq r < 0.5$ , \*\*\*:  $r \geq 0.5$

**F.** Analysis of TEs specifically occupied by H3K9me3, H2aK119ub or H3K27me3 in fhPGCs while exhibiting occupancy with another repressive epigenetic mark in fGSCs. For simplicity only epigenetic state changes that are found in more the 1% of the total analysed TEs (370,102) are shown.

**G.** Alluvial plot depicting the repressive chromatin modification detected in fhPGCs at TEs marked in somatic cells by 5mC or 5mC/H3K9me3.

**H.** Pie chart depicting the proportion of autosomal TEs in male and female hPGCs harbouring the same or sex-specific repressive chromatin profiles (left panel). Number of TEs occupied by the indicated marks sex-specifically (right panel). H3K27me3 occupancy was determined in wk9 fhPGCs / mhPGCs. Chi-square “goodness-of-fit” derived effect size. no practical difference (n):  $r < 0.2$ , \*:  $0.2 \leq r < 0.3$ , \*\*:  $0.3 \leq r < 0.5$ , \*\*\*:  $r \geq 0.5$

**I.** Number of TEs occupied by the indicated combinations of repressive marks in female and male hPGCs. Colour code indicates the co-occupancy with the active marks H3K4me3 (opal), H3K27ac (green), both marks (orange) or none of them (grey). H3K27me3 occupancy was determined in wk9 fhPGCs / mhPGCs.

**J.** Absolute and relative (fhPGCs/fGSCs) levels of the indicated epigenetic marks in TE subgroups associated with the indicated combinations of epigenetic marks in fhPGCs. Wilcoxon effect size with levels as shown in Figure 1. Level of fhPGC-specifically expressed TEs falling into the indicated TE subgroups is shown as Log2 (observed/expected) with hypergeometric test indicating significance of depletion. \*\*\*  $P < 0.001$ , n.s.  $P > 0.05$



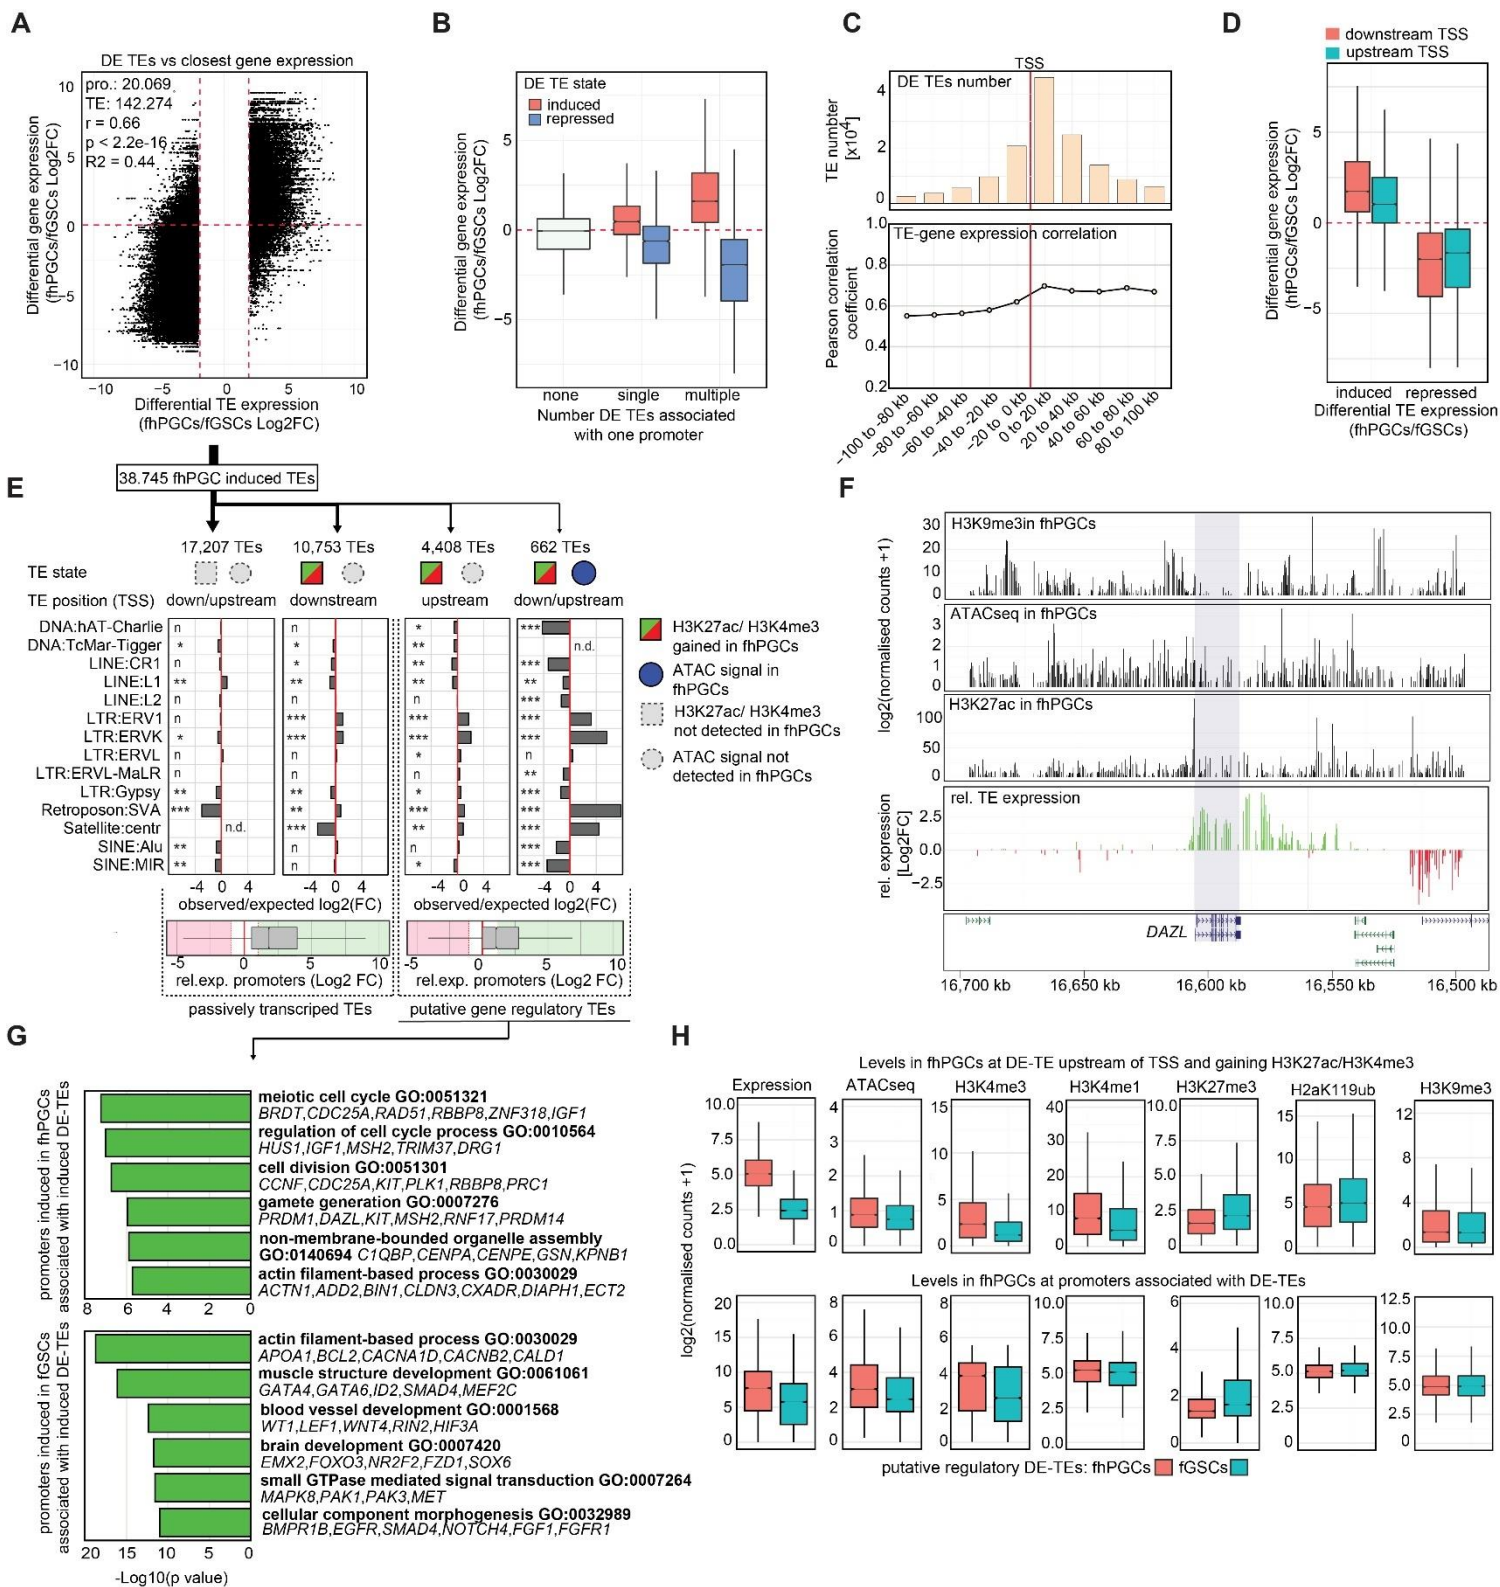

**Figure S6: Interconnection between TE and gene expression.**

**A.** Scattered plot analysing the correlation of differential TE expression with differential expression of the closest gene ( $\pm 100$ kb to TSS). Pearson correlation coefficient ( $r$ ),  $p$  value ( $p$ )

**B.** Box plot comparing differential expression (fhPGCs/fGSCs) of genes associated with no, one or multiple differentially expressed TEs (DE-TEs). Genes associated with TEs induced (red) or repressed (blue) in fhPGCs are shown.

**C.** Number of differentially expressed TEs relative to the TSS of the closest gene ( $\pm 100$ kb TSS) (upper panel). Pearson correlation coefficient of differential gene and DE-TEs expression within the indicated distances to the TSS of the associated gene (lower panel).

**D.** Box plot comparing differential expression of genes harbouring DE-TEs up- (opal) and downstream (red) of the TSS. DE-TEs are segregated into induced or repressed in fhPGCs relative to fGSCs.

**E.** Enrichment of TE families within passively transcribed DE-TEs (harbour no H3K27ac or H3K4me3 or showing H3K27ac/ H3K4me3 in fhPGCs downstream of a genic promoter), and putative regulatory DE-TEs (fhPGC-specific H3K27ac/H3K4me3 upstream of a genic promoter or fhPGC-specific H3K27ac/H3K4me3 in the presence of an ATAC-seq signal) induced in fhPGCs (upper panel). Differential expression of genes associated with the indicated subgroups of DE-TEs (lower panel). TE position was determined relative to closest genic TSS ( $\pm 100$ kb). TE enrichment was derived from the observed relative to the expected TE number. Chi-square “goodness-of-fit” derived effect size. no practical difference (n):  $r < 0.2$ , \*:  $0.2 \leq r < 0.3$ , \*\*:  $0.3 \leq r < 0.5$ , \*\*\*:  $r \geq 0.5$

**F.** Depiction of the indicated histone modifications, ATAC-seq signal, and differential expression of all DE-TEs in the vicinity of the *DAZZL* locus (-100kb TSS - +100 kb TTS).

**G.** Gene ontology enrichment analysis of promoters induced in fhPGC or fGSCs associated with putative regulatory induced DE-TEs.

**H.** Comparison of the epigenetic environment of putative regulatory DE-TEs (upper panels) induced in fhPGCs (red) or fGSCs (opal) and the genic promoters associated with these DE-TEs (lower panels). H3K27me3 occupancy was determined in wk9 fhPGCs / fGSCs.

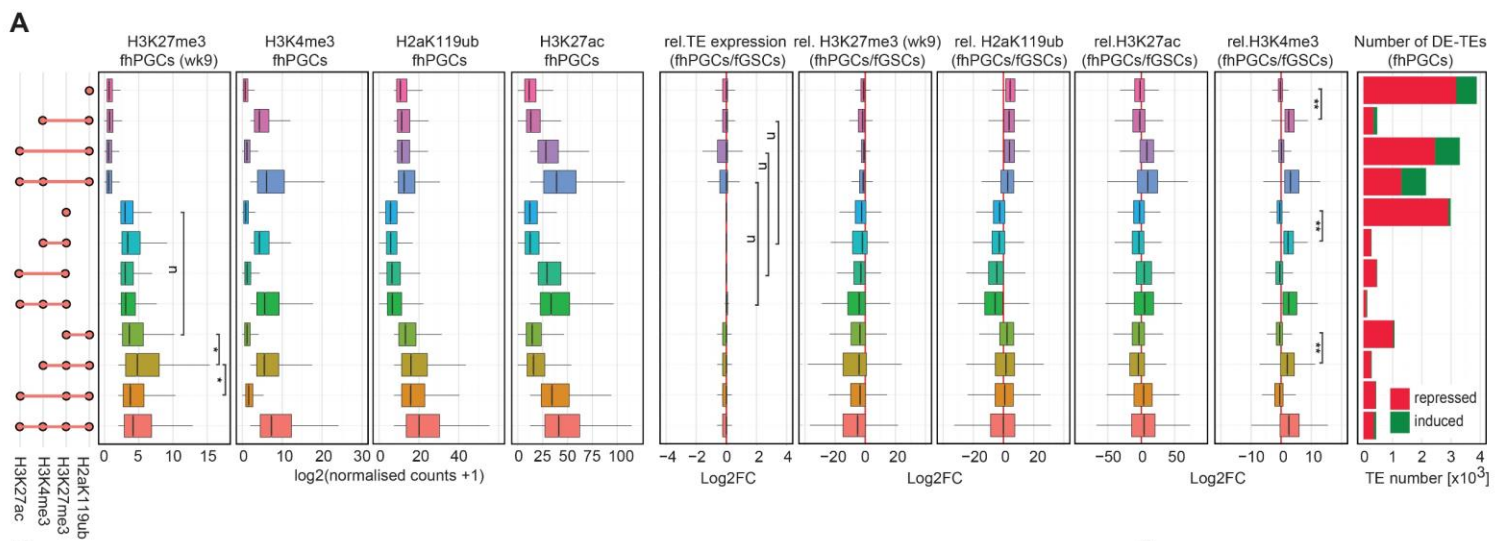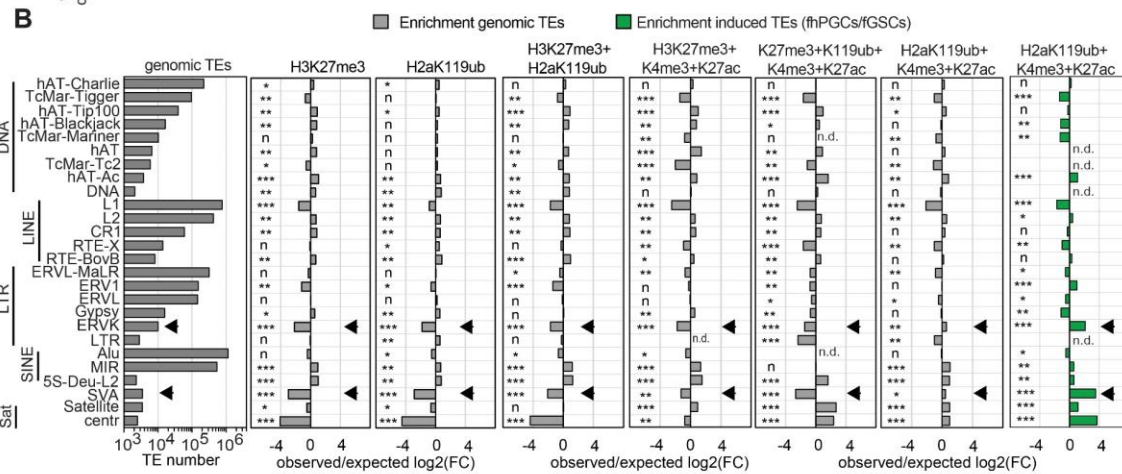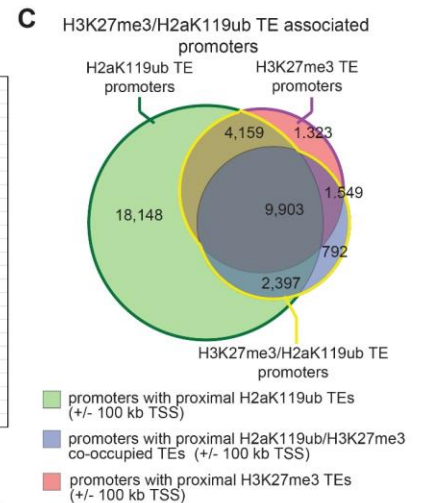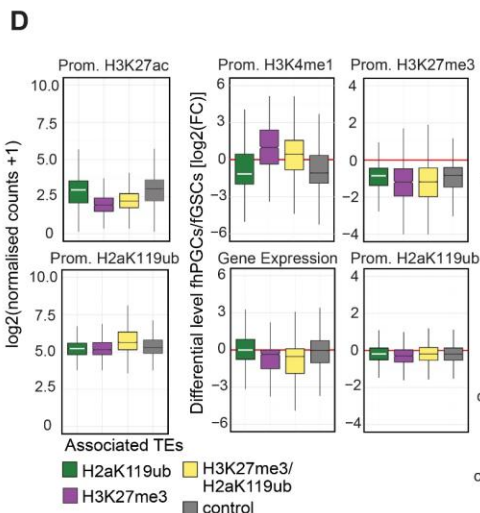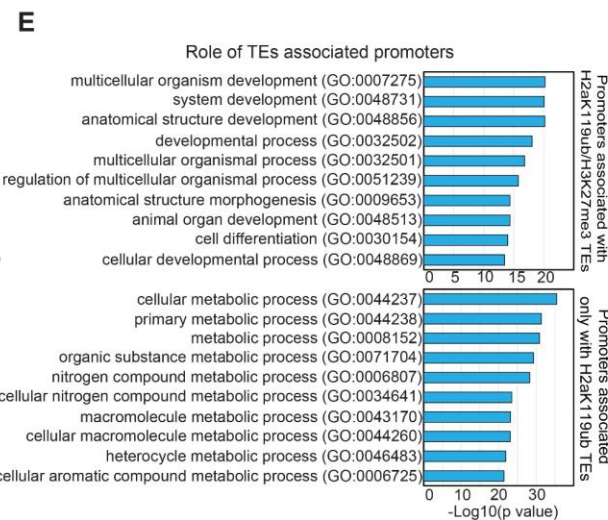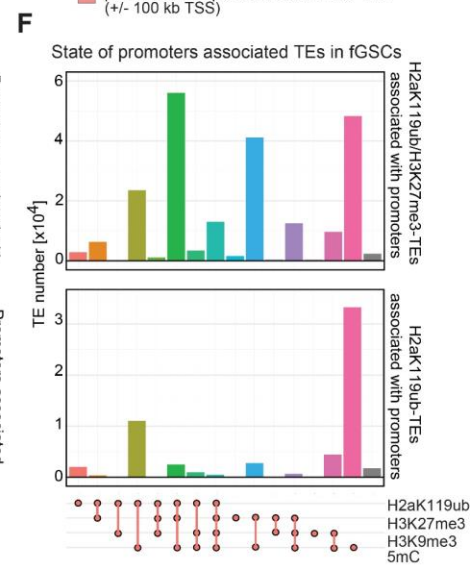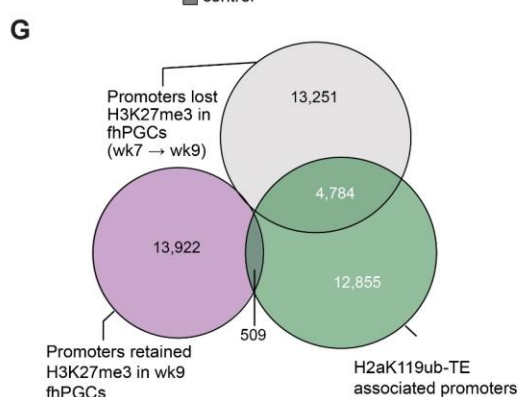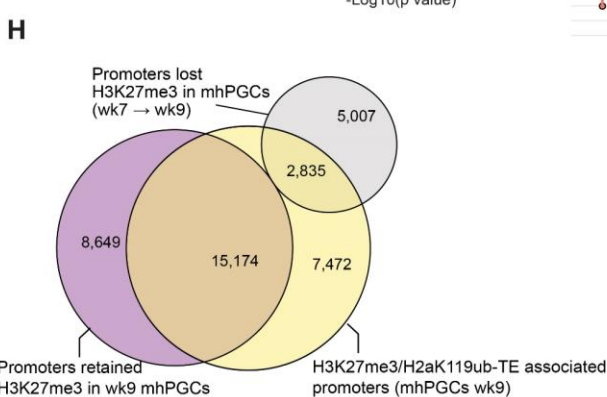



## **Figure S7: Characterisation of H3K27me3 and H2aK119ub occupied TEs in fhPGCs.**

**A.** Analysis of the epigenetic and transcriptional state of H3K27me3 and H2aK119ub occupied TEs. Absolute and relative (fhPGCs/fGSCs) levels of expression and occupancy with indicated epigenetic marks in TE subgroups associated with the indicated combinations of epigenetic marks in fhPGCs are depicted. Number differentially expressed TEs between fhPGCs and fGSCs falling in each TE subgroup are shown. Wilcoxon effect size with levels as shown in Figure 1.

**B.** Enrichment of TE families in TEs marked by H3K27me3, H2aK119ub or both in the presence or absence of H3K27ac and H3K4me3 (grey). Enrichment of TE families in TEs induced in fhPGC and co-occupied by H2aK119ub, H3K27ac and H3K4me3 (green). Arrows indicate evolutionarily young TE families enriched in the TE subgroup occupied by H2aK119ub in the absence of H3K27me3. n.d. = not detected. Chi-square “goodness-of-fit” derived effect size with levels as shown in Figure 1.

**C.** Overlap of genic promoters associated TEs that are occupied by H2aK119ub (green), H3K27me3 (red) or both (blue).

**D.** Analysis of genic promoters associated with H3K27me3, H2aK119ub or H3K27me3/H2aK119ub occupied TEs in the vicinity (TSS +/- 100kb) in fhPGCs. Promoter occupancy with H3K27ac and H2aK119ub in fhPGCs as well as relative levels (fhPGCs/fGSCs) of H3K4me1, H3K27me3, H2aK119ub and expression are depicted.

**E.** Gene ontology enrichment analysis of promoters associated with TEs marked by H3K27me3 and H2aK119ub or only H2aK119ub in fhPGCs.

**F.** Repressive epigenetic environment in fGSCs of promoter-proximal TEs identified in fhPGCs. TEs were grouped by their promoter association into i.) only H2aK119ub (lower panel), or ii.) H3K27me3 and H2aK119ub promoter-proximal TEs (upper panel).

**G.** Overlap between genic promoters that lost (grey) or retained (violet) H3K27me3 between wk7 and 9 in fhPGCs and promoters associated with H2aK119ub occupied TEs (green).

**H.** Overlap between genic promoters that lost (grey) or retained (violet) H3K27me3 between wk7 and 9 in mhPGCs and promoters associated with H3K27me3/H2aK119ub occupied TEs (yellow).

**A**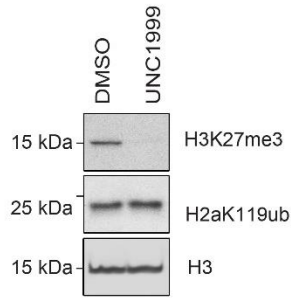**B**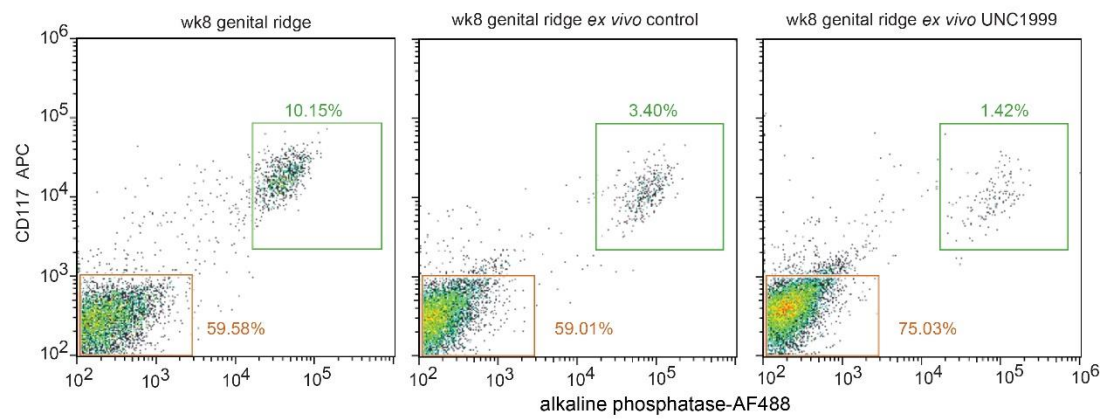**C**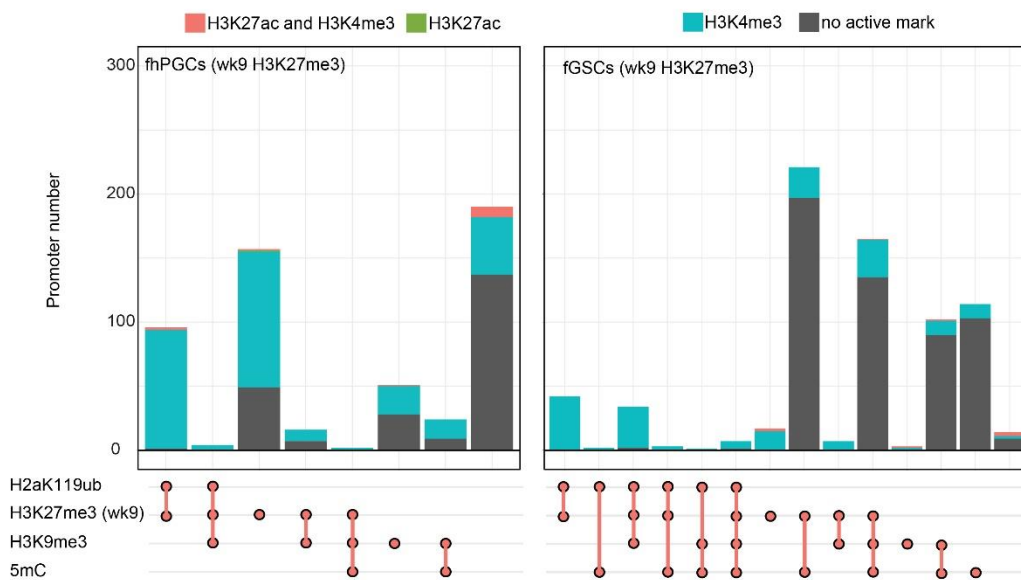**D**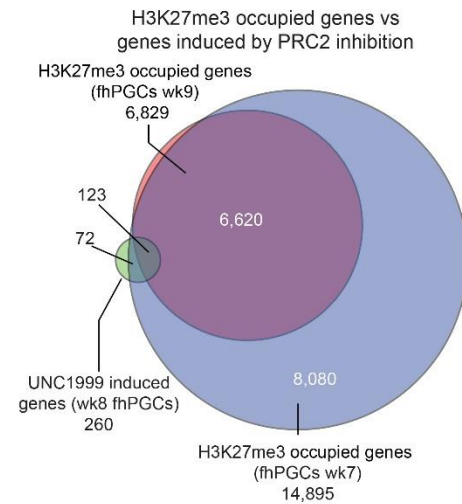**E**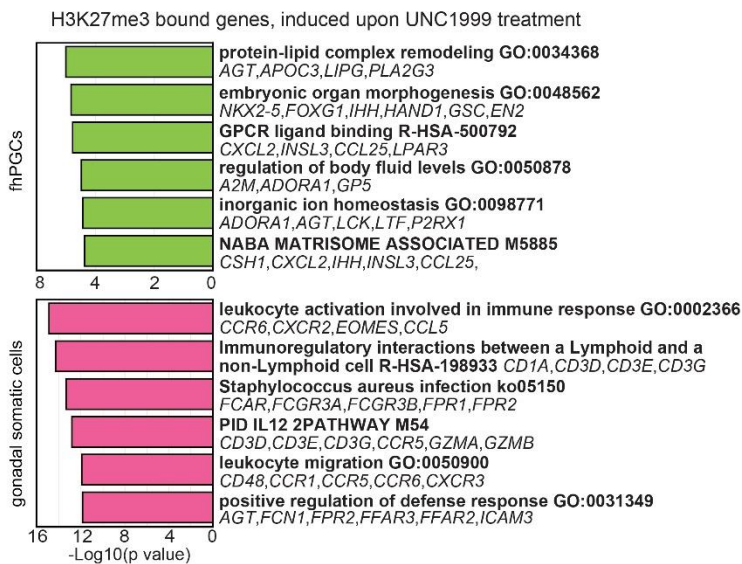

**Figure S8: H3K27me3 mediates somatic gene repression in fhPGCs.**

**A.** Western Blot on somatic cells purified from human genital ridges *ex vivo* cultured for 10 days in the presence of UNC1999 or control. Membranes were decorated with the indicated antibodies.

**B.** FACS analysis depicting portions of alkaline phosphatase/CD117 double-positive fhPGCs in non-cultured and *ex vivo* cultured female genital ridges treated with DMSO or 1 $\mu$ M UNC1999 for 10 days. Non-cultured and *ex vivo* cultured genital ridges originate from different and *ex vivo* cultured genital ridges from the same embryo.

**C.** Repressive marks detected at promoters associated with genes induced in UNC1999 treated fhPGCs. Repressive marks detected in fhPGCs (left panel) or fGSCs (right panel). Colour code indicates the co-occupancy with the active marks H3K4me3 (opal), H3K27ac (green), both marks (orange) or none of both (grey). Note that H3K27me3 promoter occupancy was obtained from wk9 fhPGCs and fGSCs.

**D.** Overlap between genes induced in UNC1999 treated fhPGCs and genes associated with promoters occupied by H3K27me3 in week 7 or week 9 fhPGCs. Genes were counted to be associated with H3K27me3 when at least one of the annotated promoters was occupied by H3K27me3 in fhPGCs.

**E.** Gene ontology enrichment analysis of genes associated with H3K27me3 occupied promoters, which were induced in UNC1999 treated fhPGCs (upper panel) or fGSCs (lower panel) relative to control.



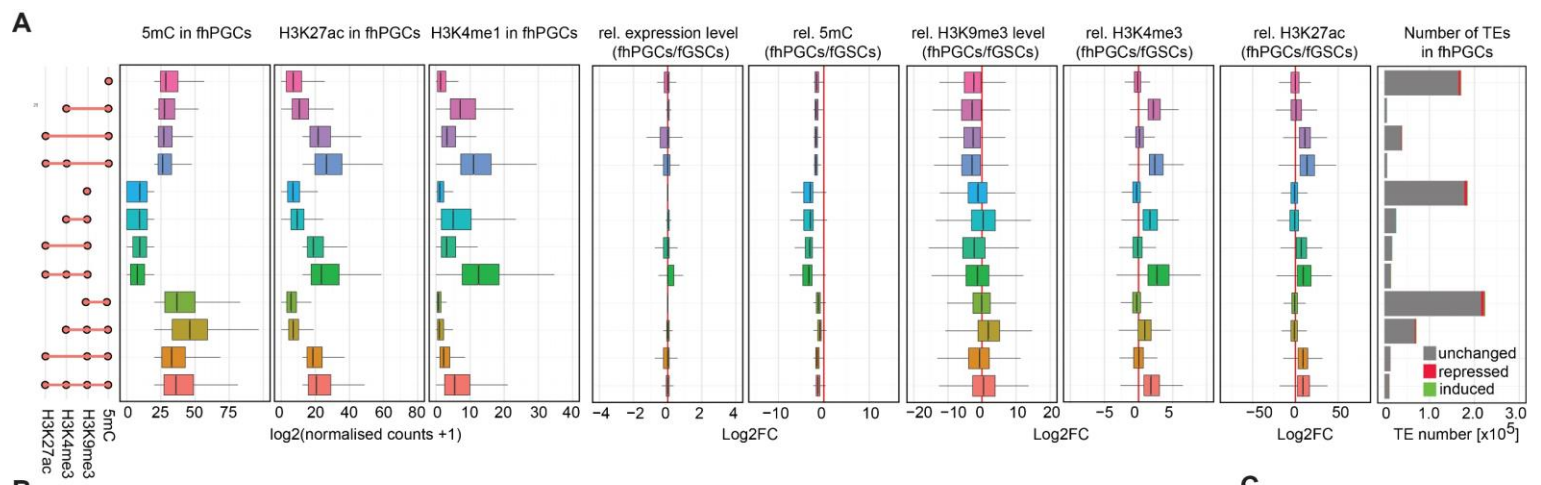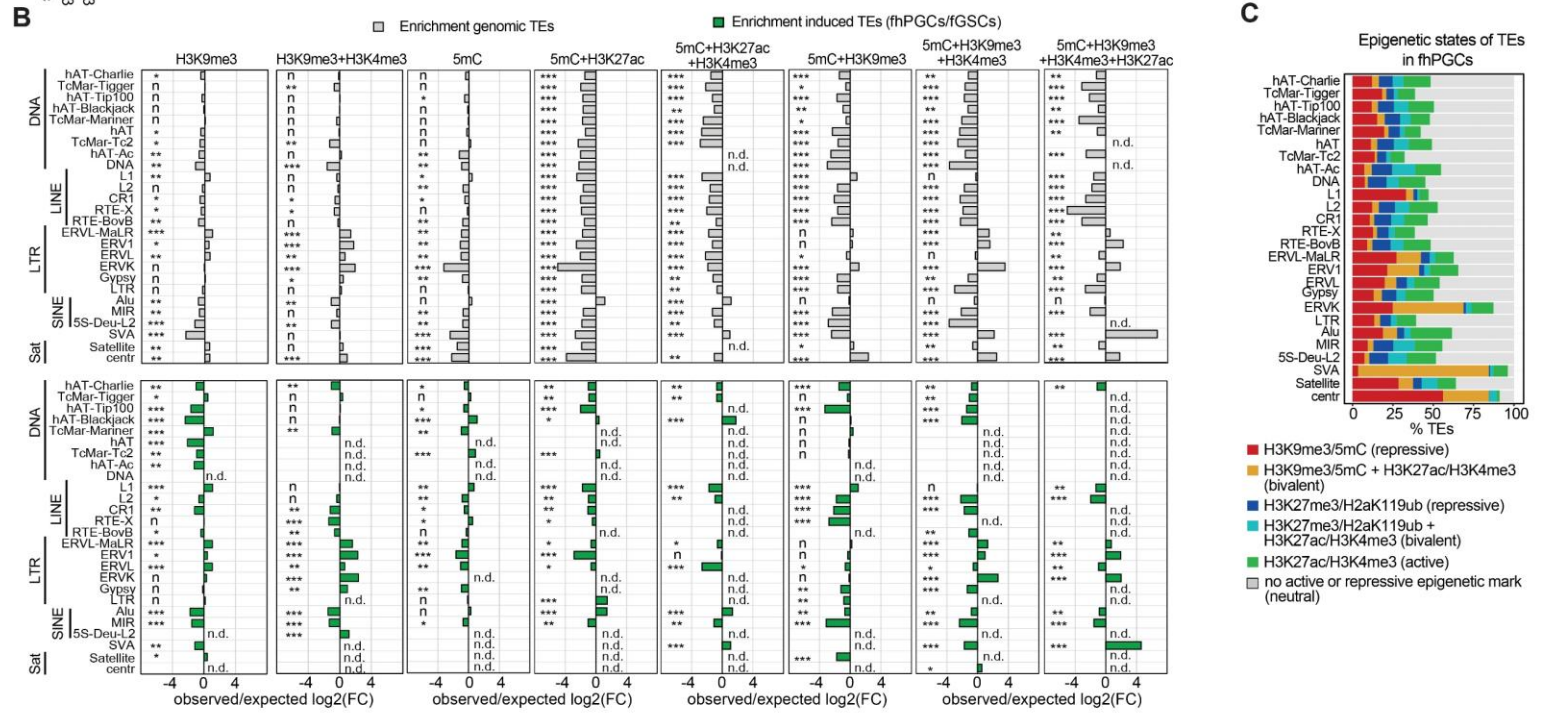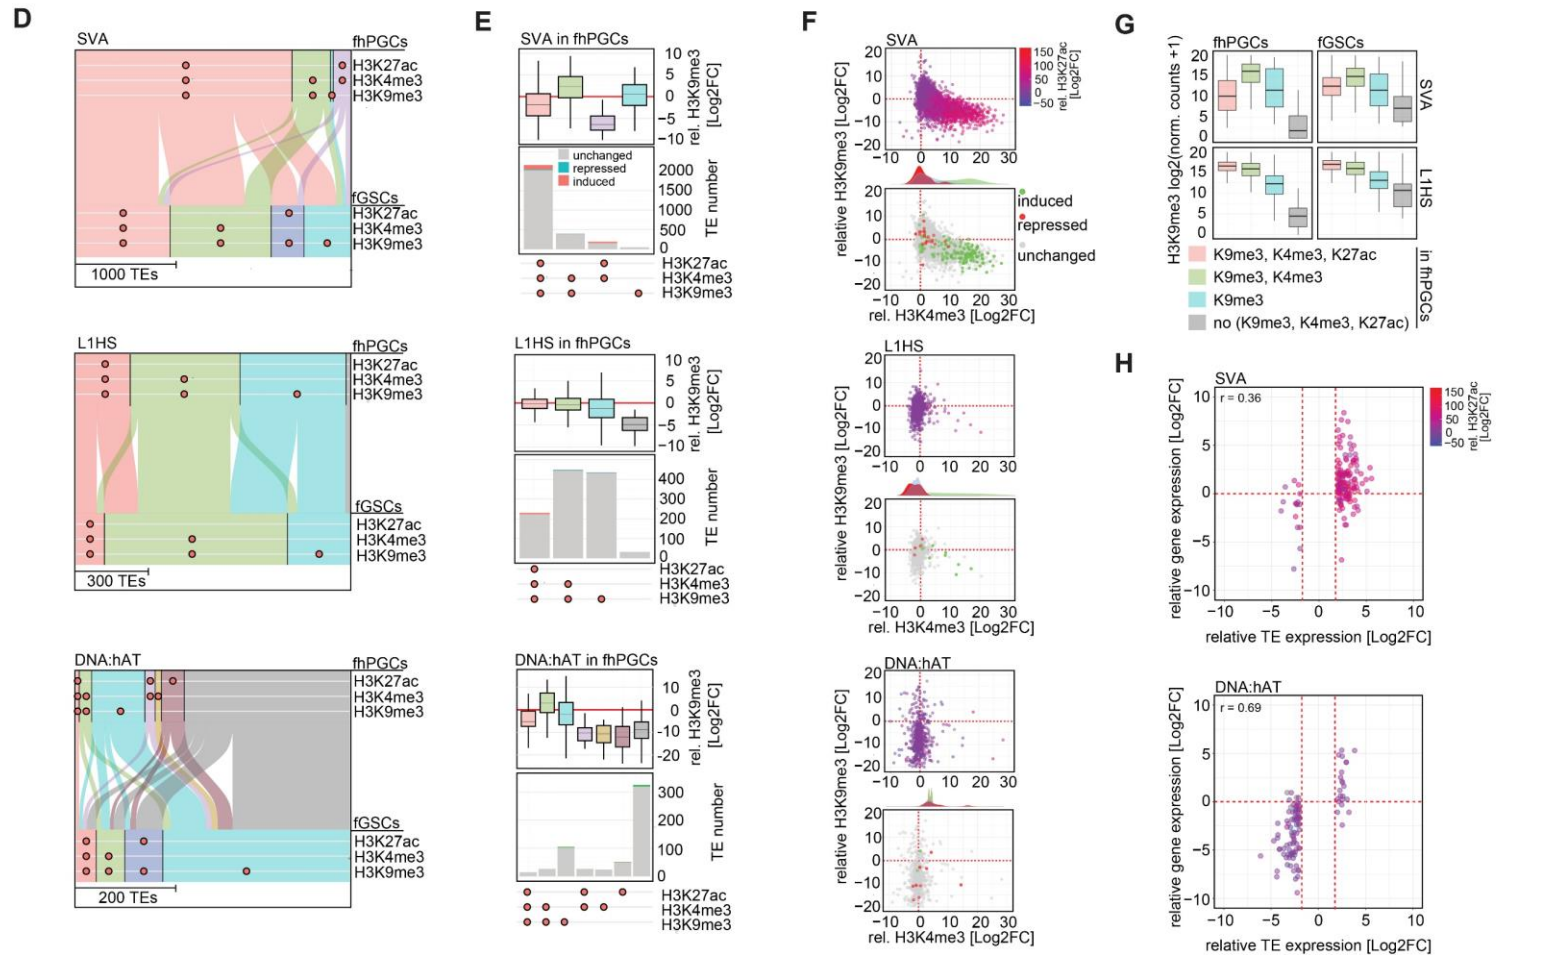

**Figure S9: Inefficient euchromatization and retention of H3K9me3 at most evolutionarily young TEs in fhPGCs.**

**A.** Analysis of the epigenetic and transcriptional state of H3K9me3 and 5mC occupied TEs. Absolute and relative (fhPGCs/fGSCs) level of expression and occupancy with indicated epigenetic marks in TE subgroups associated with the indicated combinations of epigenetic marks in fhPGCs are depicted. Number differentially expressed TEs between fhPGCs and fGSCs within the indicated TE subgroups is shown.

**B.** Enrichment of TE families in TE subgroups marked by H3K9me3, 5mC, or H3K9me3 and 5mC alone or in combination with H3K4me3 or H3K27ac and H3K4me3 in fhPGCs. Enrichment is depicted for TEs annotated within the genome (grey), and for TEs specifically induced in fhPGCs (green). n.d. = not detected. Chi-square “goodness-of-fit” derived effect size. no practical difference (n):  $r < 0.2$ , \*:  $0.2 \leq r < 0.3$ , \*\*:  $0.3 \leq r < 0.5$ , \*\*\*:  $r \geq 0.5$

**C.** Portion of TEs within major TE families that residing in repressed (only repressive modifications), bivalent (repressive and active modifications) or neutral (no modifications) epigenetic states in fhPGCs. Repressive and bivalent states were subdivided into regulation through A.) H3K9me3 and/or 5mC, and B.) H2aK119ub and/or H3K27me3

**D.** Alluvial plots comparing the epigenetic states of SVA, L1HS and DNA:hAT elements in fhPGCs and fGSCs. All TEs were selected for occupancy by H3K9me3 in fGSCs.

**E.** Relative levels of H3K9me3 (fhPGCs/fGSCs) and TE number of SVA, L1HS and DNA:hAT elements grouped according to their epigenetic state in fhPGCs. All TEs were selected for occupancy by H3K9me3 in fGSCs.

**F.** Comparison of relative levels of H3K9me3 and H3K4me3 (fhPGCs/fGSCs) of SVA, L1HS and DNA:hAT elements. Colour code indicates changes in H3K27ac levels (upper panels) or expression in fhPGCs relative to fGSCs (lower panels). All TEs were selected for being occupied by H3K9me3 in fGSCs. Note, transcriptional induction in fhPGCs is most frequently observed at elements harbouring high levels of H3K4me3 and H3K27ac.

**G.** Absolute levels of H3K9me3 at SVA and L1HS elements grouped according to their epigenetic state in fhPGCs. All TEs were selected for being occupied by H3K9me3 in fGSCs. Note, SVA but not L1HS elements exhibit reduced H3K9me3 levels when co-occupied by H3K4me3 and H3K27ac.

**H.** Correlation between relative expression (fhPGCs/fGSCs) of SVA (upper panel) or DNA:hAT elements (lower panel) with expression of the nearest promoter ( $\pm 100$ kb TSS). Colour code indicates changes in H3K27ac level between fhPGCs and fGSCs. All shown elements were occupied by H3K9me3 in fGSCs.  $r$  = Pearson correlation coefficient



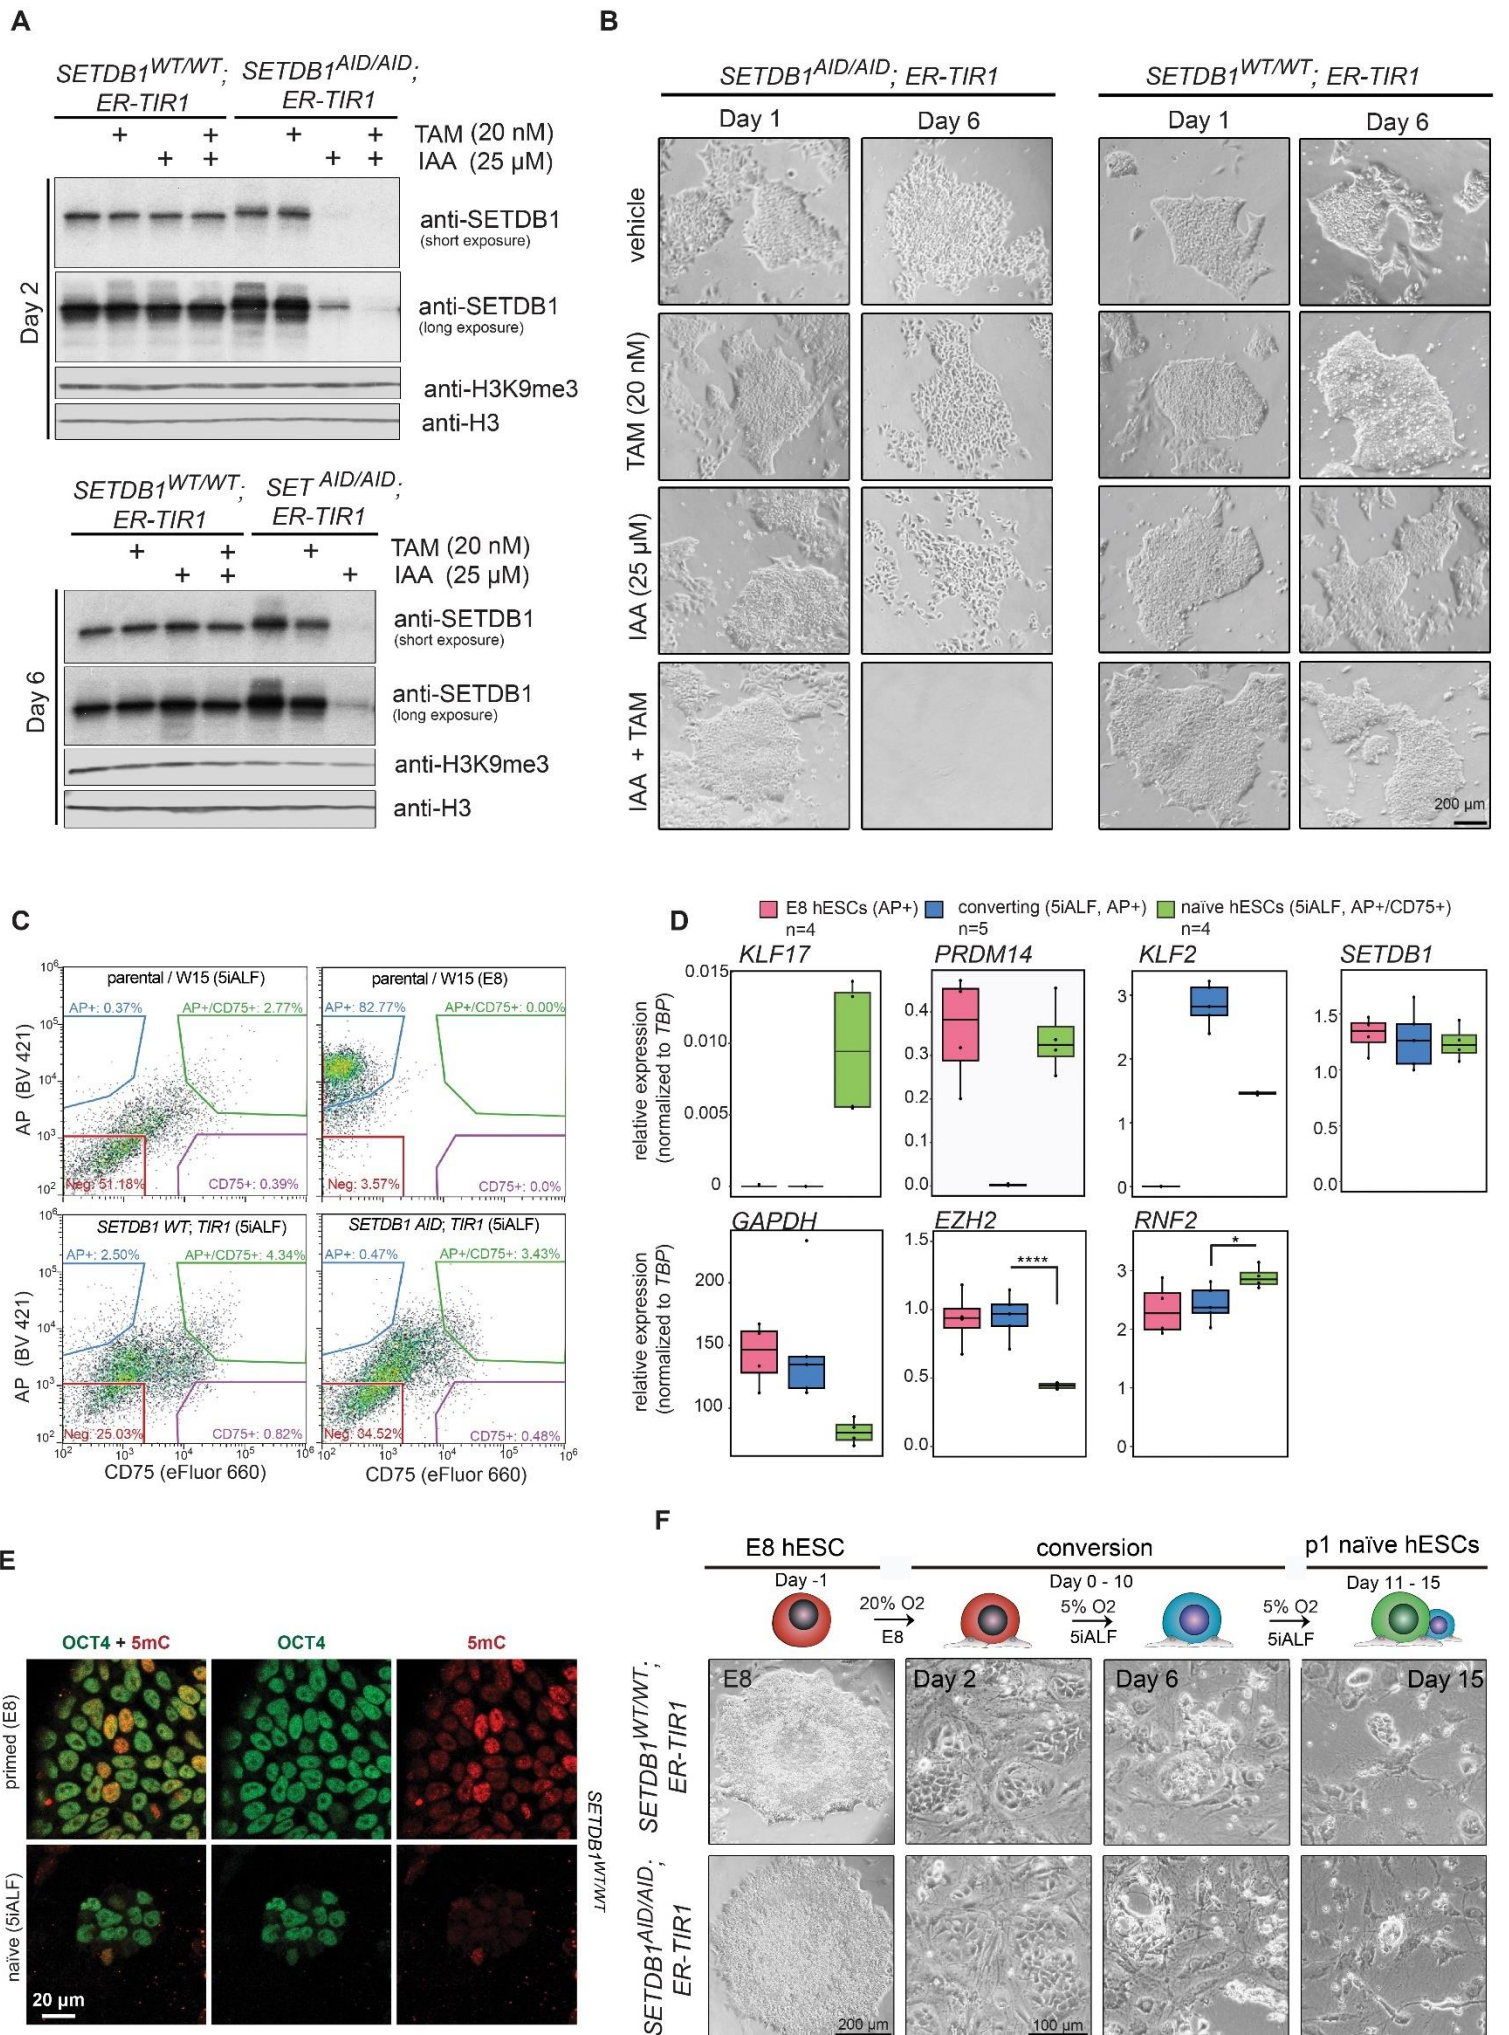



**Figure S10: Depletion of SETDB1 in hESCs using an inducible degron.**

**A-B.** Western Blot analysis (**A**) and bright field images (**B**) of *SETDB1 wild-type* and *SETDB1-AID* hESCs expressing ER-TIR1 cultured in Essential 8 conditions. Cells were treated for 1 and 6 days with 20 nM Tamoxifen, 25  $\mu$ M IAA, 20 nM Tamoxifen and 25  $\mu$ M IAA or vehicle control.

**C.** FACS analysis on *SETDB1 wild-type* and *SETDB1-AID* naïve hESCs as well as *SETDB1 wild-type* hESCs cultured in Essential 8 conditions stained with anti-alkaline phosphatase (AP)-BV421 and anti- CD75-eFluro660.

**D.** qRT-PCR analysing the indicated transcripts in FACS purified *SETDB1 wild-type* AP+, CD75+ double-positive naïve hESCs, AP+ converting hESCs, and AP+ hESCs cultured in Essential 8 conditions (n=4, independent technical replicates). Student's t test  $p < 0.05$  (\*),  $p < 0.001$  (\*\*\*\*)

**E.** Immunofluorescence staining detecting 5mC and OCT4 in passage 2 naïve and Essential 8 *SETDB1 wild-type* hESCs.

**F.** Bright field images of the conversion of *SETDB1 wild-type* and *SETDB1-AID* cells from Ess8 cultured hESCs to naïve hESCs.

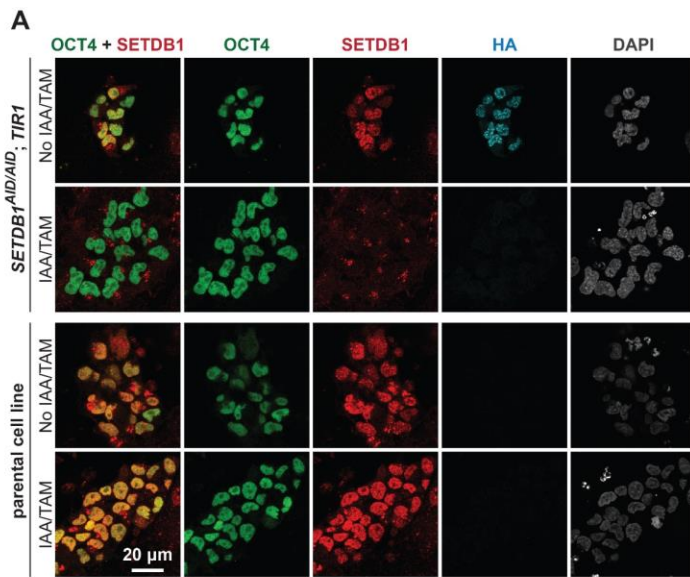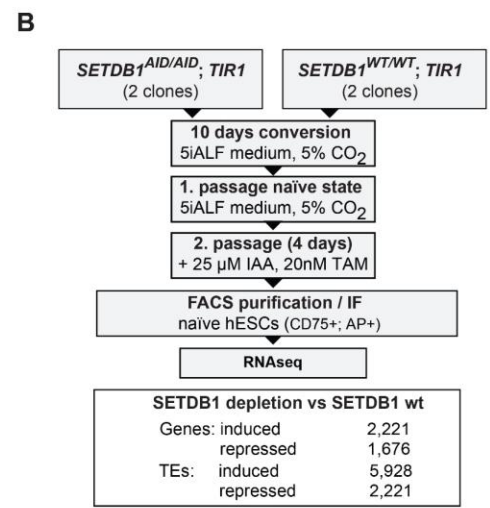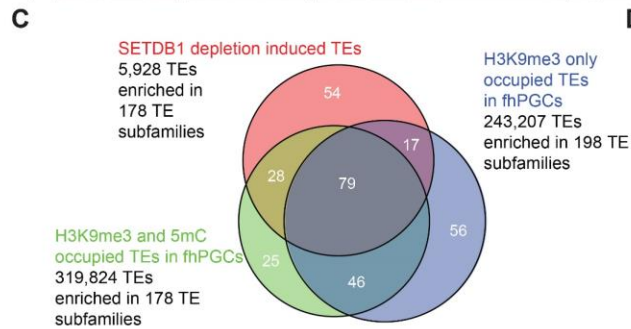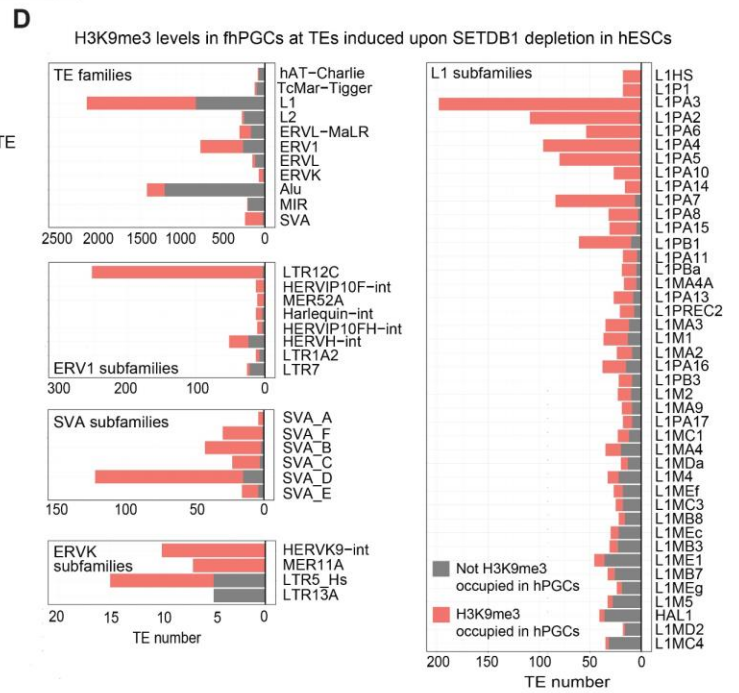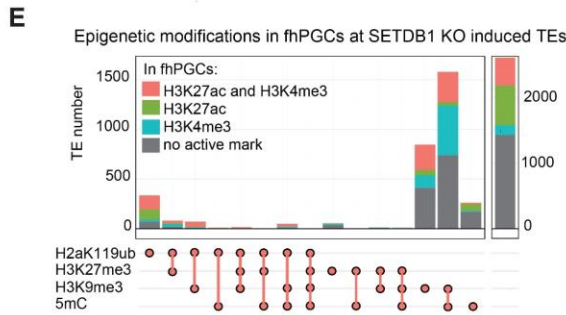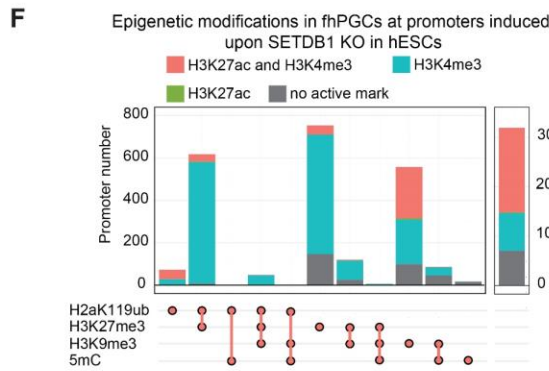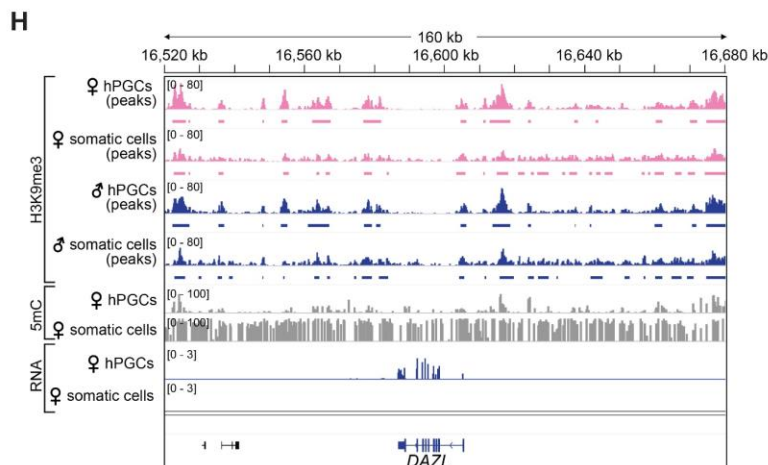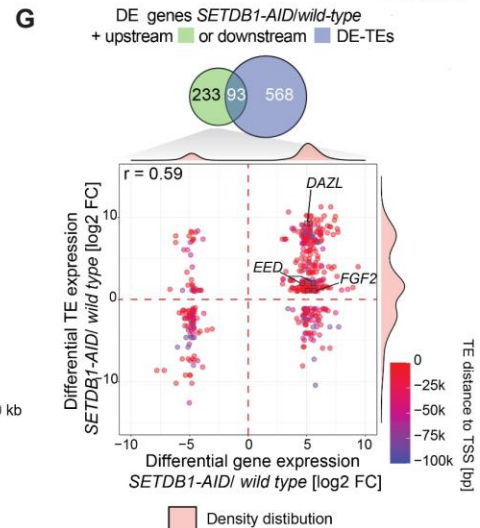

**Figure S11: SETDB1-deposited H3K9me3 safeguards the hypomethylated human genome against evolutionarily young TE expression.**

**A.** Immunofluorescence staining of *SETDB1* wild-type and *SETDB1-AID* naïve hESCs expressing ER-TIR1. Cells were treated for 4 days with 20 nM Tamoxifen and 25  $\mu$ M IAA and stained with antibodies detecting HA, OCT4 and SETDB1.

**B.** Experimental outline of the transcriptomic analysis of SETDB1 depleted naïve hESCs (upper panel) and number of differentially expressed genes and TEs (lower panel). In brief, 2 *SETDB1-AID* and *SETDB1-WT* hESC clones harbouring an *ER-TIR1* transgene were converted into the naïve state and treated with IAA and TAM for 4 days before naïve hESCs were purified by FACS and analysed by RNA-seq. SETDB1 depletion was confirmed by immunofluorescence.

**C.** Comparison of TE subfamilies enriched for TEs marked in fhPGCs by H3K9me3 alone (blue) or in combination with 5mC (green), with TE subfamilies enriched for transcriptionally induced TEs upon SETDB1 deletion in naïve hESCs (red).

**D.** TE families and subfamilies of TEs gaining expression upon SETDB1 depletion in naïve hESCs. The colour code indicates whether the corresponding TE locus in fhPGCs is marked by H3K9me3 (red) or not (grey).

**E-F.** Occupancy of the indicated repressive epigenetic marks in fhPGCs at TEs (**E**) or genes (**F**) transcriptionally induced upon SETDB1 depletion in naïve hESCs. Colour code indicates the co-occupancy with the active marks H3K4me3 (opal), H3K27ac (green), both marks (orange) or none of them (grey). H3K27me3 occupancy was determined in wk9 fhPGCs.

**G.** Portion of the 3,897 differentially expressed genes between *SETDB1-AID* and wild-type naïve hESCs harbouring differentially expressed TEs upstream (green) or downstream (blue) of the TSS ( $\pm 100$  kb) (upper part). Correlation of expression changes of genes and upstream DE-TEs. Colour code indicates the distance from the nearest TSS (lower part).  $r$  = Pearson correlation coefficient.

**H.** Genome browse snapshots of the *DAZZL* locus depicting H3K9me3, 5mC and expression levels in the indicated cell types.

| Antibodies used for ChIP-seq |        |            |                |             |            |               |
|------------------------------|--------|------------|----------------|-------------|------------|---------------|
| Antibody                     | host   | clonality  | provider       | cat. Number | lot        | amount per IP |
| anti-H3K4me1                 | Rabbit | polyclonal | Active Motif   | 39298       | 19417002   | 0.25µl        |
| anti-H3K4me3                 | Rabbit | polyclonal | Abcam          | ab8580      | GR273043-4 | 0.25µg        |
| anti-H3K9me3                 | Rabbit | polyclonal | Abcam          | ab8898      | GR257230-1 | 0.25µg        |
| anti-H3K27ac                 | Rabbit | polyclonal | Active Motif   | 39134       | 20017009   | 0.25µg        |
| anti-H3K27me3                | Rabbit | monoclonal | cell signaling | 9733        | 8          | 0.5µl         |
| anti-H2AK119ub               | Rabbit | polyclonal | cell signaling | 8240        | 6          | 0.25µl        |

| Antibodies used for Immunofluorescence |         |            |                           |             |             |          |
|----------------------------------------|---------|------------|---------------------------|-------------|-------------|----------|
| Antibody                               | host    | clonality  | provider                  | cat. number | lot number  | dilution |
| anti-GFP                               | Chicken | Polyclonal | Abcam                     | ab13970     | GR3361051-1 | 1:1000   |
| anti-OCT4                              | Mouse   | monoclonal | BD Biosciences            | 611203      | 8087969     | 1:500    |
| anti-HA                                | Rabbit  | monoclonal | Cell Signaling Technology | 3724        |             | 1:500    |
| anti-5mC                               | Rabbit  | polyclonal | Cell Signaling Technology | 28692       |             | 1:150    |
| anti-SETDB1                            | Mouse   | monoclonal | Abcam                     | ab107225    | GR315074-2  | 1:500    |

| Antibodies used for FACS                             |       |            |                |             |            |                     |
|------------------------------------------------------|-------|------------|----------------|-------------|------------|---------------------|
| Antibody                                             | host  | clonality  | provider       | cat. number | lot number | Volume per staining |
| Alexa Fluor 488-conjugated anti-Alkaline Phosphatase | Mouse | Monoclonal | BD Pharmingen  | 561495      | 7132712    | 5ul/sample          |
| APC-conjugated anti-c-KIT                            | Mouse | Monoclonal | Invitrogen     | CD11705     | 20289675A  | 5ul/sample          |
| eFluor 660-conjugated anti-CD75                      | Mouse | Monoclonal | eBioscience    | 50-0759-42  |            | 5ul/sample          |
| BV421-conjugated anti-Human Alkaline Phosphatase     | Mouse | Monoclonal | BD biosciences | 565624      |            | 5ul/sample          |

| Antibodies used for Western Blot |        |            |                           |             |            |                     |
|----------------------------------|--------|------------|---------------------------|-------------|------------|---------------------|
| Antibody                         | host   | clonality  | provider                  | cat. number | lot number | Volume per staining |
| anti-H3                          | Rabbit | polyclonal | Abcam                     | ab1791      | 7132712    | 1:10000             |
| anti-HA                          | Rabbit | monoclonal | Cell Signaling Technology | 3724        | 20289675A  | 1:1000              |
| anti-H3K27me3                    | Rabbit | monoclonal | Cell Signaling Technology | 9733        |            | 1:2500              |
| anti-H3K9me3                     | Rabbit | polyclonal | Abcam                     | ab8898      | GR257230-1 | 1:5000              |
| anti-H2AK119ub                   | Rabbit | polyclonal | Cell Signaling Technology | 8240        |            | 1:2500              |
| anti-SETDB1                      | Mouse  | monoclonal | Abcam                     | ab107225    | GR315074-2 | 1:1000              |

**Table S1.**

Antibodies used in this study



| qRT-PCR primers |                         |                        |
|-----------------|-------------------------|------------------------|
| Target          | Forward (5'→3')         | Reverse (5'→3')        |
| EZH2            | CCAGACTGGTGAAGAGTTGTTTT | CAAGGGATTTCATTCTCG     |
| RNF2            | CGACAGCGCACAGACAAG      | TTCTCCTTTGCTTCGAAGTTCT |
| SETDB1          | AGGCACGTGGTGGAAAGTC     | CCACTCACATCTTTTGCATCC  |
| KLF2            | ACCTACACCAAGAGTTCGCATC  | CCGTGTGCTTTCGGTAGTGG   |
| KLF17           | GCTGCCCAGGATAACGAGAAC   | ATCTCTGCGCTGTGAGGAAAG  |
| DNMT3L          | GAAGACCTGGACGTCGCATC    | AGTGCCTGCTCCTTATGGCT   |
| OTX2            | GGGAGAGGACGACGTTCA      | TCTGGGTACCGGGTCTTG     |
| DNMT1           | ACTGGCGCGATCTGCCAAC     | AGGCTTTGCCGGCTTCCACG   |
| TFCP2L1         | AGCTCAAAGTTGTCTACTGCC   | TTCTAACCCAAGCACAGATCCC |
| PRDM14          | CTACCGAGCCCGAGTGGCCTAC  | TAGAGCCATCCCAGGACCGCA  |
| GAPDH           | CGCTTCGCTCTCTGCTCCTCTGT | GGTGACCAGGCGCCAATACGA  |

| CRISPR sgRNA |        |                              |                     |
|--------------|--------|------------------------------|---------------------|
| gRNA name    | Target | Target coordinate (hg38)     | gRNA sequence       |
| SETDB1_sgRNA | SETDB1 | chr1:150,964,345-150,964,364 | GCAGAGGACGTCTTCTTAG |

**Table S2.**

Oligonucleotides used in this study
